# Supplementary material for: A series of isopolymolybdate–viologen hybrids with photo-, thermo- and electro-chromic properties
Source: Royal Society of Chemistry journal article supplement (doi:10.1039/d3dt02928j), 2023-01-01
Supplement: d3dt02928j1.pdf [file d3dt02928j1.pdf]

## Electronic Supplementary Information (ESI)

# A Series of Isopolymolybdate-viologen Hybrids with Photo-, Thermo- and Electro-chromic Properties

Shuang Yu<sup>a</sup>, Tao Liu<sup>b</sup>, Jun Ying<sup>\*a</sup>, Aixiang Tian<sup>a</sup>, Mengle Yang<sup>a</sup>, Xiuli Wang<sup>\*a</sup>

<sup>a</sup>College of Chemistry and Materials Engineering, Bohai University, Jinzhou, 121013, P. R. China. Fax: +86-416-3400158; Email: [ying@bhu.edu.cn](mailto:ying@bhu.edu.cn); [wangxiuli@bhu.edu.cn](mailto:wangxiuli@bhu.edu.cn).

<sup>b</sup>College of Sciences, North China University of Science and Technology, Tangshan, Hebei 063210, China. Fax: 0315-8816666.

## Materials and General Methods

All reagents and solvents were purchased from commercial sources except 1,3-bcbpy·2Cl, 1,4-bcbpy·2Cl and 1,1-pmbpy·2Cl, which were synthesized based on literature reports.<sup>1-3</sup> So there was no further purification before their use. The FT-IR spectra were taken on a Varian FT-IR 640 spectrometer (KBr pellets) in the range of 400–4000 cm<sup>-1</sup>. Powder X-ray diffraction (PXRD) patterns were recorded on an Ultima IV with D/teX Ultra diffractometer at 40 kV, 40 mA with Cu K $\alpha$  ( $\lambda = 1.5406$  Å) radiation in the  $2\theta$  range of 5–50°. UV-Vis absorption spectra were obtained using a UV-1801 ultra violet spectrophotometer.

## Preparation of compounds 1–4

### Synthesis of (1,3-bcbpy)<sub>2</sub>·( $\delta$ -Mo<sub>8</sub>O<sub>26</sub>) (1)

Cd(NO<sub>3</sub>)<sub>2</sub>·4H<sub>2</sub>O (0.1 g, 0.4 mmol), (NH<sub>4</sub>)<sub>6</sub>Mo<sub>7</sub>O<sub>24</sub>·4H<sub>2</sub>O (0.1 g, 0.08 mmol) and 1,3-bcbpy·2Cl (0.02 g, 0.01 mmol) were dissolved in 20 ml distilled water at room temperature. The suspension was stirred at room temperature for 1 h. Then the pH was adjusted to about 3.97 with 1.0 mol·L<sup>-1</sup> HNO<sub>3</sub> and 1.0 mol·L<sup>-1</sup> NaOH, and the suspension was sealed in a Teflon-lined autoclave (25 ml) and maintained at 150 °C for 7 d. After cooling to room temperature at the rate of 10 °C·h<sup>-1</sup>, the colorless block

crystal of **1** was collected and washed with distilled water (yield 38% based on Mo). Anal. Calcd for **1** C<sub>52</sub>H<sub>44</sub>Mo<sub>8</sub>N<sub>4</sub>O<sub>34</sub> (2036.43): C 30.64, H 2.16, N 2.75%. Found: C 30.62, H 2.13, N 2.74%.

#### **Synthesis of {Co(1,4-bcbpy)<sub>2</sub>(H<sub>2</sub>O)<sub>2</sub>[H<sub>2</sub>(β-Mo<sub>8</sub>O<sub>26</sub>)]}·2H<sub>2</sub>O·2CH<sub>2</sub>O (**2**)**

CoCl<sub>2</sub>·6H<sub>2</sub>O (0.1 g, 0.73 mmol), MoO<sub>3</sub> (0.1 g, 0.69 mmol) and 1,4-bcbpy·2Cl (0.05 g, 0.09 mmol) were added to a mixture of 3 mL DMF and 5 mL distilled water, and stirred continuously for 60 min. The mixture was transferred to a 10 mL glass bottle and heated at 90°C for 4 d. The temperature was reduced to room temperature with a rate of 5 °C per hour. The product was washed with deionized water and dried. The light pink block crystals of **2** were obtained (yield 34% based on Mo). Anal. Calcd. for C<sub>54</sub>H<sub>54</sub>CoMo<sub>8</sub>N<sub>4</sub>O<sub>40</sub> (2225.44): C 29.12, H 2.43, N 2.52% Found: C 29.11, H 2.42, N 2.50%.

#### **Synthesis of (1,4-bcbpy)<sub>2</sub>·(δ-Mo<sub>8</sub>O<sub>26</sub>)·2H<sub>2</sub>O (**3**)**

NiSO<sub>4</sub>·2H<sub>2</sub>O (0.1 g, 0.4 mmol), (NH<sub>4</sub>)<sub>6</sub>Mo<sub>7</sub>O<sub>24</sub>·4H<sub>2</sub>O (0.1 g, 0.08 mmol) and 1,4-bcbpy·2Cl (0.02 g, 0.01 mmol) were dissolved in 20 ml distilled water at room temperature. The suspension was stirred at room temperature for 1 h. Then the pH was adjusted to about 3.84 with 1.0 mol·L<sup>-1</sup> HNO<sub>3</sub> and 1.0 mol·L<sup>-1</sup> NaOH, and the suspension was sealed in a Teflon-lined autoclave (25 ml) and maintained at 150 °C for 7 d. After cooling to room temperature at the rate of 10 °C·h<sup>-1</sup>, the light yellow block crystal of **3** was collected and washed with distilled water (yield 37% based on Mo). Anal. Calcd for **3** C<sub>52</sub>H<sub>48</sub>Mo<sub>8</sub>N<sub>4</sub>O<sub>36</sub> (2072.46): C 30.11, H 2.32, N 2.70%. Found: C 30.10, H 2.31, N 2.67%.

#### **Synthesis of {Cu(1,1-pmbby)<sub>2</sub>(H<sub>2</sub>O)[H<sub>2</sub>(β-Mo<sub>8</sub>O<sub>26</sub>)<sub>2</sub>]}·5H<sub>2</sub>O·C<sub>2</sub>H<sub>7</sub>N (**4**)**

CuCl<sub>2</sub>·2H<sub>2</sub>O (0.1 g, 0.73 mmol), MoO<sub>3</sub> (0.1 g, 0.69 mmol) and 1,1-pmbby·2Cl (0.05 g, 0.09 mmol) were added to a mixture of 3 mL DMF and 5 mL distilled water, and stirred continuously for 60 min. The mixture was transferred to a 10 mL glass bottle and heated at 90°C for 4 d. The temperature was reduced to room temperature with a rate of 5 °C per hour. The product was washed with deionized water and dried. The blue block crystals of **4** were obtained (yield 45% based on Mo). Anal. Calcd. for C<sub>58</sub>H<sub>69</sub>CuMo<sub>16</sub>N<sub>9</sub>O<sub>58</sub> (3418.78): C 20.36, H 2.02, N 3.69% Found: C 20.34, H 2.00, N

3.68%.

### **Photoelectrochemical measurement**

The photocurrent measurements were recorded on a CHI660E Electrochemical Workstation with a three-electrode configuration that the platinum plate, Ag/AgCl electrode and catalyst modified electrode acted as the counter electrode, reference electrode and working electrode, respectively. A 0.2 M Na<sub>2</sub>SO<sub>4</sub> solution was used as the electrolyte. A 300 W Xe lamp (CEL-HXF300-T3, Beijing Zhongjiao Jinyuan Technology Co., Ltd) was used as the light source.

### **The preparation of working electrode**

Indium tin oxide (ITO) glass was ultrasonically washed with ethanol for 30 min, then rinsed with deionized water and dried for use. 10 mg of grinded crystals were added into 0.4 mL 0.5% Nafion solution with isopropanol. The suspension was ultrasonically mixed for 1 h, which dripped onto ITO glass with a coating of 10 × 10 mm<sup>2</sup>. The prepared working electrode was dried at 60 °C for 3 h.

### **Preparation of 1/2/3/4-CPE**

The compound 1/2/3/4 modified carbon paste electrode (1/2/3/4-CPE) were made as follows: a mixture of graphite powder (0.10 g) and compound 1 (0.01 g) was ground together by using an agate mortar for about 15 min. Then, while stirring, 0.1 mL of liquid paraffin was added to the resulting mixture. After that, the mixture was stuffed into a glass tube with an inner diameter of 1.5 mm. And then the surface of the glass tube was wiped with weighing paper. In the same manner, the 2/3/4-CPE was made with compounds 2, 3 and 4.

### **Fabrication of electrochromic devices**

To study the electrochromic properties of compounds 1–4, the corresponding electrochromic devices were prepared. The following are the steps used for the fabrication of a rigid electrochromic device. Two ITO-glasses (2 × 3 cm) were used to create a slit-type rigid electrochromic device with a slit thickness (d) of ~50 nm. The electrochromic solution contained 0.01 M of compounds 1–4, 0.01 M ferrocene,

and 0.1 M TBAP dissolved in PC. TBAP was used as electrolyte and ferrocene was the anode species in the electrochromic solution, which is an essential compound to compensate for charge neutrality in the faradaic reaction. Then, the electrochromic solution was injected into the device. Finally, the electrochromic devices for compounds **1–4** were successfully obtained (**1/2/3/4–ECD**).

## X-ray crystallographic study

A Bruker SMART APEX II with Mo-K $\alpha$  radiation ( $\lambda = 0.71073 \text{ \AA}$ ) was used to collect X-Ray diffraction analyses data. All the structures were solved by direct methods and refined on  $F^2$  by full-matrix least squares using the SHELXS-14 package.<sup>4</sup> The crystal data and structure refinement of compounds **1–4** are shown in Table S1. Selected bond lengths and angles of compounds **1–4** are summarized in Table S2. The CCDC numbers are 2224945, 2230421, 2224931 and 2224927 for **1–4** (Cambridge Crystallographic Data Center).

**Table S1.** Crystal data and structure refinements for compounds **1–4**.

| Compound                             | <b>1</b>                                                         | <b>2</b>                                                         | <b>3</b>                                                         | <b>4</b>                                                          |
|--------------------------------------|------------------------------------------------------------------|------------------------------------------------------------------|------------------------------------------------------------------|-------------------------------------------------------------------|
| Empirical formula                    | C <sub>52</sub> H <sub>44</sub> Mo <sub>8</sub> N <sub>4</sub> O | C <sub>54</sub> H <sub>54</sub> CoMo <sub>8</sub> N <sub>4</sub> | C <sub>52</sub> H <sub>48</sub> Mo <sub>8</sub> N <sub>4</sub> O | C <sub>58</sub> H <sub>69</sub> CuMo <sub>16</sub> N <sub>9</sub> |
|                                      | 34                                                               | O <sub>40</sub>                                                  | 36                                                               | O <sub>58</sub>                                                   |
| Formula weight                       | 2036.43                                                          | 2225.44                                                          | 2072.46                                                          | 3418.78                                                           |
| Crystal system                       | Triclinic                                                        | Monoclinic                                                       | Monoclinic                                                       | Triclinic                                                         |
| Space group                          | P-1                                                              | C2/m                                                             | P2 <sub>1</sub> /n                                               | P-1                                                               |
| a/Å                                  | 10.9560(6)                                                       | 12.7429(4)                                                       | 13.6738(4)                                                       | 15.3467(3)                                                        |
| b/Å                                  | 11.1745(6)                                                       | 20.7101(6)                                                       | 11.8186(3)                                                       | 16.5545(3)                                                        |
| c/Å                                  | 15.9449(11)                                                      | 12.6924(7)                                                       | 19.9517(6)                                                       | 21.5569(4)                                                        |
| $\alpha$ /°                          | 69.5270(10)                                                      | 90                                                               | 90                                                               | 96.1750(10)                                                       |
| $\beta$ /°                           | 73.0910(10)                                                      | 99.1440(10)                                                      | 102.2930(10)                                                     | 101.5210(10)                                                      |
| $\gamma$ /°                          | 63.6740(10)                                                      | 90                                                               | 90                                                               | 110.1720(10)                                                      |
| Volume/Å <sup>3</sup>                | 1617.57(17)                                                      | 3307.0(2)                                                        | 3150.37(15)                                                      | 4943.61(16)                                                       |
| Z                                    | 1                                                                | 2                                                                | 2                                                                | 2                                                                 |
| D <sub>c</sub> (g·cm <sup>-3</sup> ) | 2.091                                                            | 2.173                                                            | 2.185                                                            | 2.204                                                             |
| $\mu$ /mm <sup>-1</sup>              | 1.596                                                            | 1.811                                                            | 1.643                                                            | 2.255                                                             |

|                                         |               |               |               |               |
|-----------------------------------------|---------------|---------------|---------------|---------------|
| F(000)                                  | 992.0         | 2110.0        | 2024.0        | 3132.0        |
| R <sub>1</sub> <sup>a</sup> [I > 2σ(I)] | 0.0332 0.0508 | 0.0294 0.0391 | 0.0430 0.0575 | 0.0497 0.0764 |
| wR <sub>2</sub> <sup>b</sup> (all data) | 0.0668 0.0734 | 0.0666 0.0745 | 0.0984 0.1094 | 0.1154 0.1313 |
| GOF on F <sup>2</sup>                   | 1.029         | 1.190         | 1.074         | 1.031         |

<sup>a</sup>  $R^1 = \frac{\sum ||F_o| - |F_c||}{\sum |F_o|}$ ; <sup>b</sup>  $wR^2 = \left[ \frac{\sum w(F_o^2 - F_c^2)^2}{\sum w(F_o^2)^2} \right]^{1/2}$

**Table S3.** TG results for compounds **2** and **4**.

| Compound   | <b>2</b> | <b>4</b> |
|------------|----------|----------|
| cal. %     | 3.24     | 3.16     |
| observed % | 3.22     | 3.13     |

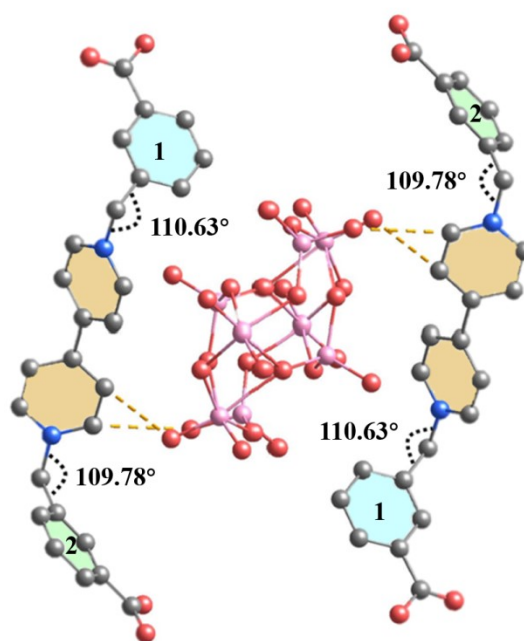

**Fig. S1.** The angles in the asymmetric unit of compound **1**.

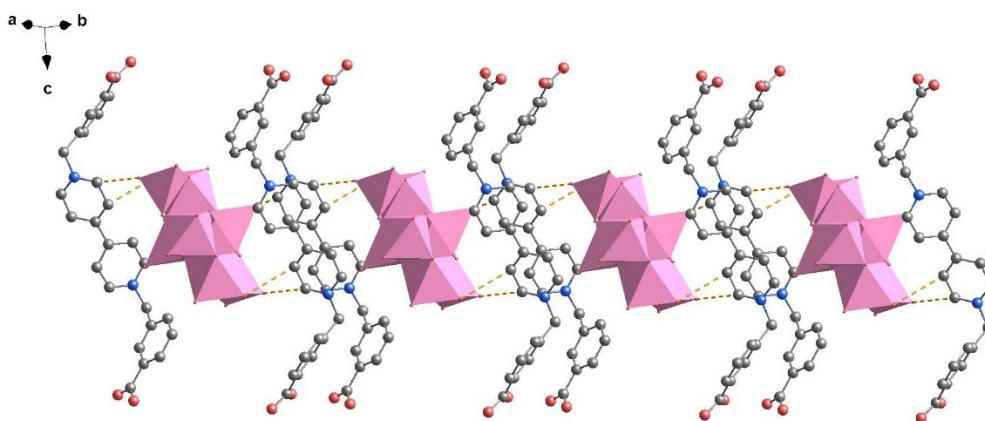

**Fig. S2.** The supramolecular 1D chain of compound **1**.

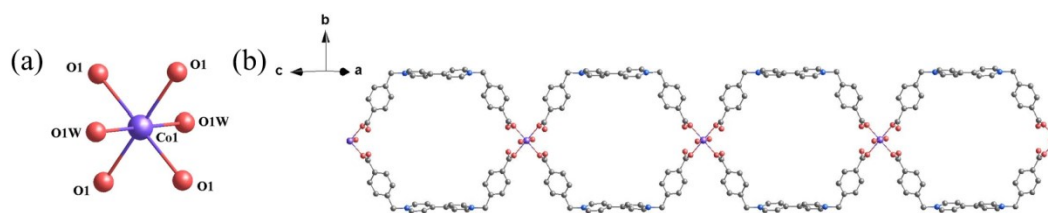

**Fig. S3.** (a) Coordination environment of metal Co1. (b) The metal-organic 1D chain of **2**.

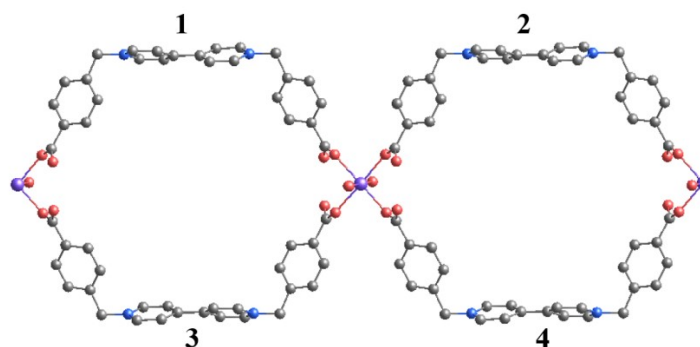

**Fig. S4.** Branches 1-4 in  $[\text{Co}_3(1,4\text{-bcbpy})_4]^{6+}$ .

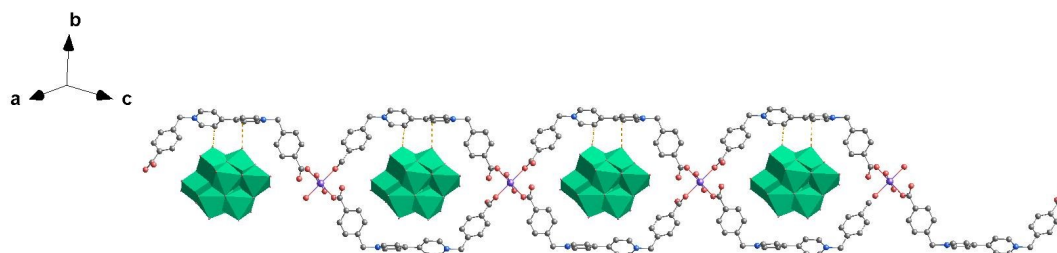

**Fig. S5.** The 1D chain of **2**.

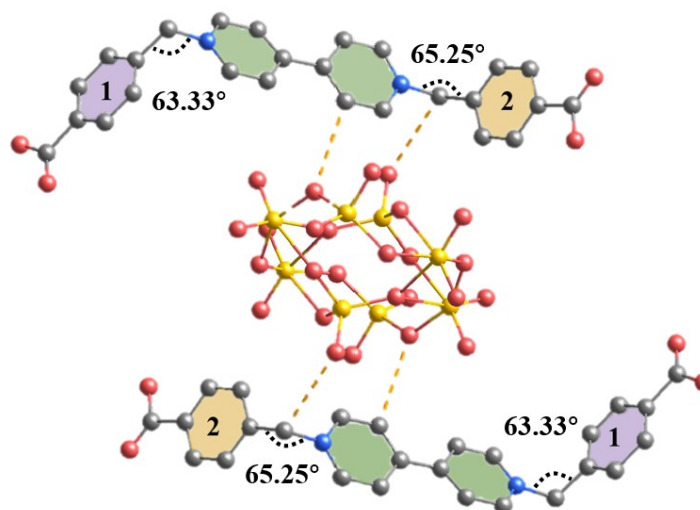

**Fig. S6.** The angles in the asymmetric unit of compound **3**.

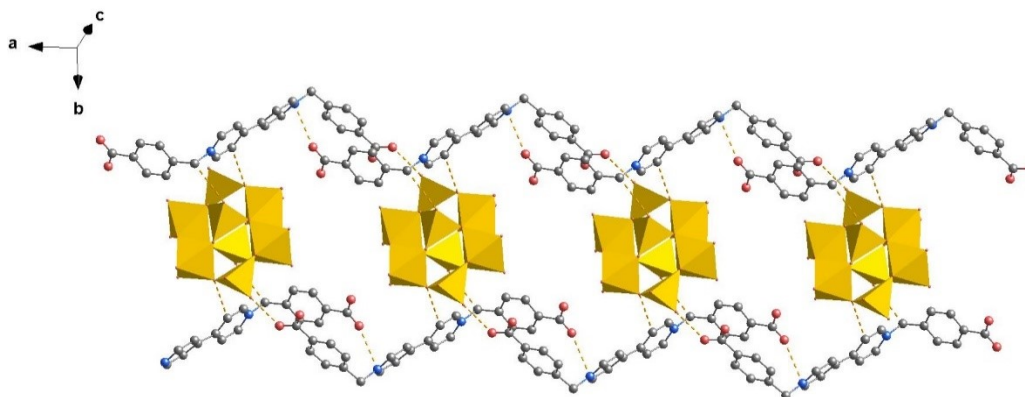

**Fig. S7.** The supramolecular 1D chain of compound **3**.

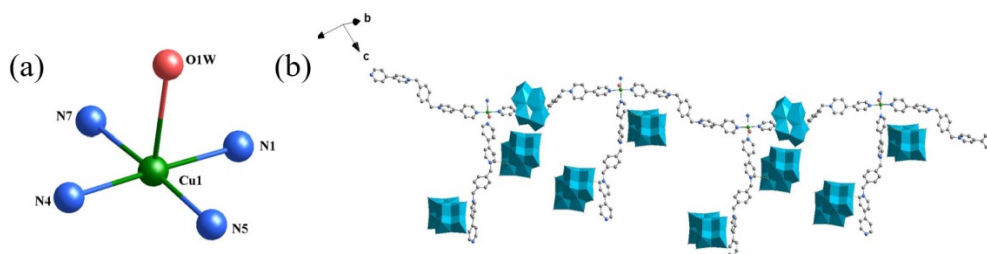

**Fig. S8.** (a) Coordination environment of metal Cu1. (b) The 1D chain of compound **4**.

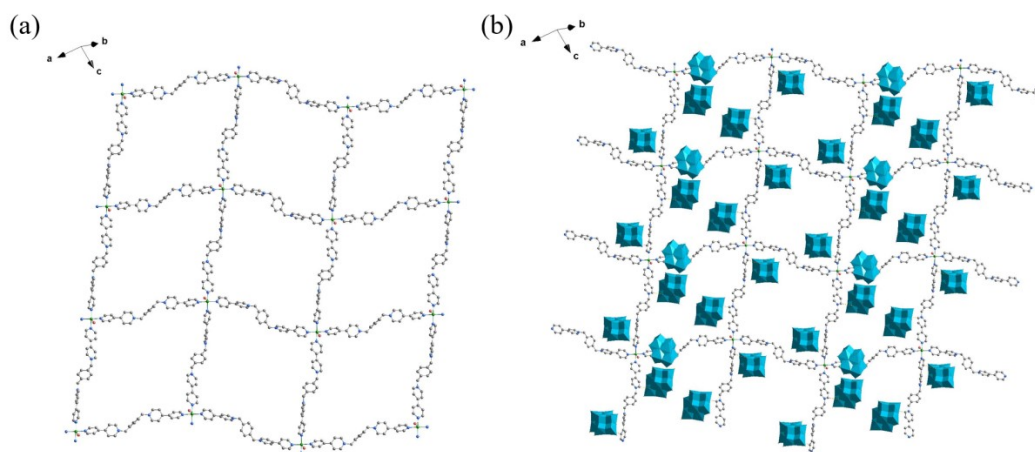

**Fig. S9.** (a) The metal-organic layer of compound **4**. (b) The 2D layer of **4**.

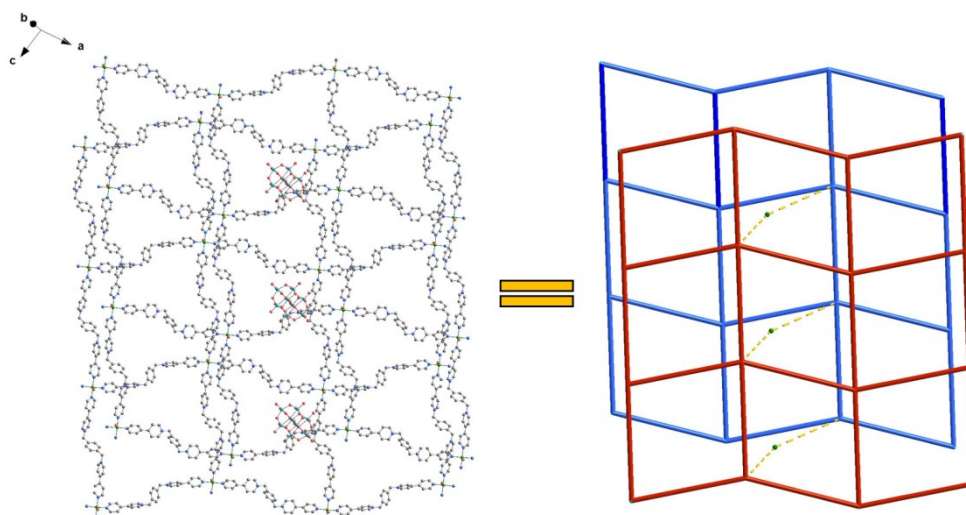

**Fig. S10.** The 3D supramolecular framework of compound **4**.

### FT–IR Spectra and TG Analysis

The FT–IR spectra of compounds **1–4** was shown in Figure S11. The characteristic peaks at 914, 818, 726 and 655  $\text{cm}^{-1}$  for **1**, 913, 819, 724 and 653  $\text{cm}^{-1}$  for **3** are attributed to the  $\delta\text{-Mo}_8$  anion, and peaks at 914, 663  $\text{cm}^{-1}$  for **2**, 912, 662  $\text{cm}^{-1}$  for **4** are attributed to the  $\beta\text{-Mo}_8$  anion.<sup>5-6</sup> The characteristic peaks in the region of 1766–1002  $\text{cm}^{-1}$  for **1**, 1763–1005  $\text{cm}^{-1}$  for **2**, 1765–1008  $\text{cm}^{-1}$  for **3** and 1762–1009  $\text{cm}^{-1}$  for **4**, are attributed to 1,3-bcbpy in **1**, 1,4-bcbpy in **2** and **3** and 1,1-pmbby in **4**, respectively.<sup>7-9</sup> What's more, we also analyzed the TG curves of compounds **2** and **4** (Figure S12). **2** and **4** have two main weightlessness processes. The mass loss in the first step below 300 °C is attributed to the loss of water molecules and free organic solvents, while the mass loss in the second step within the range of 400–800 °C is attributed to the loss of organic ligands. Within the range of 50–800 °C, the total weight loss rate of **2** and **4** is consistent with the calculated value (Table S3).



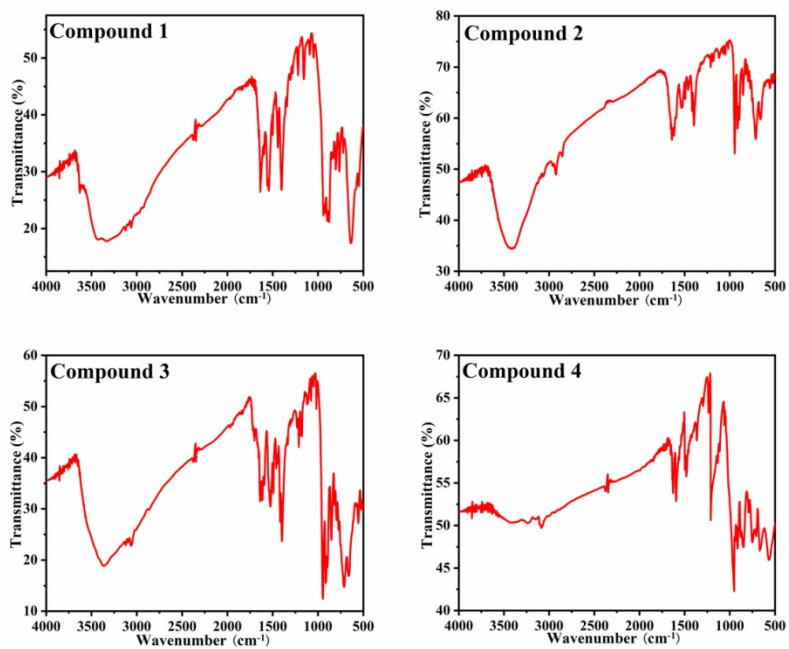

**Fig. S11.** The FT-IR spectra of compounds 1–4.

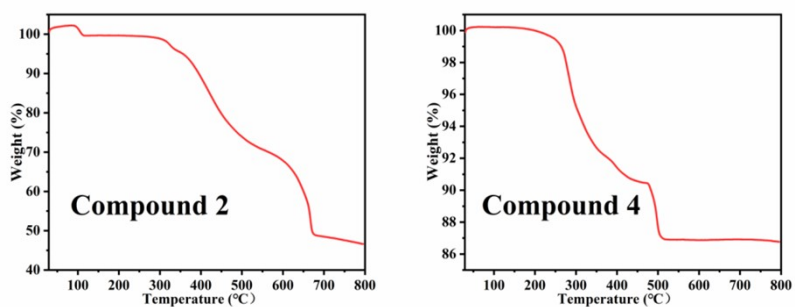

**Fig. S12.** The TG curves of compounds 2 and 4.

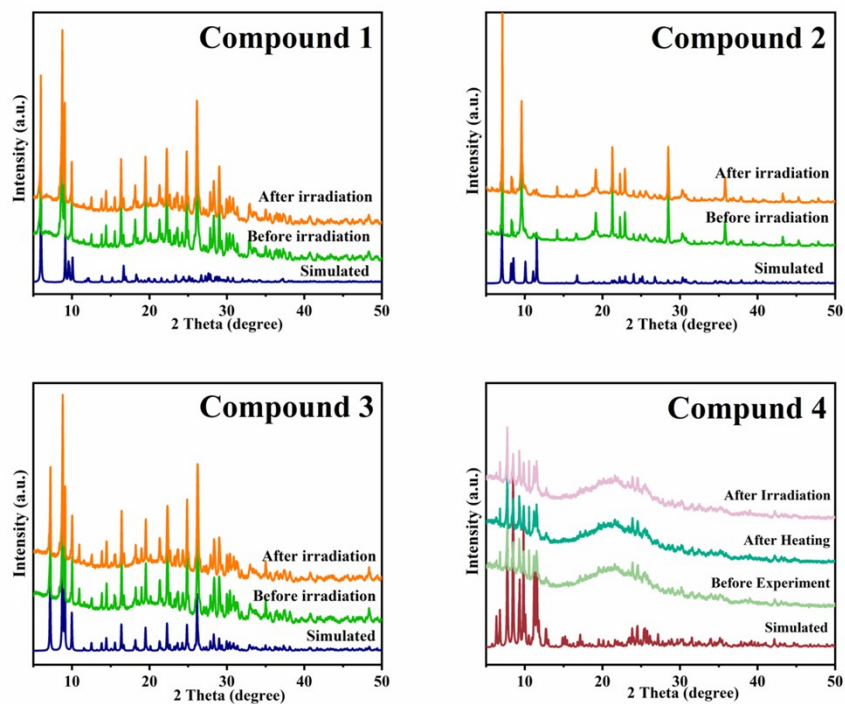

**Fig. S13.** The PXRD of compounds 1–4 before and after color change.

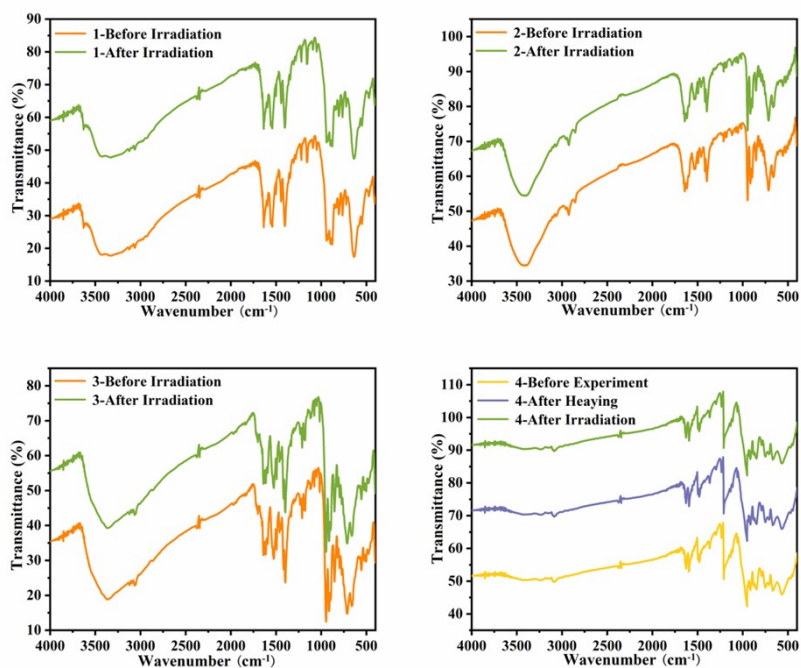

**Fig. S14.** The FT-IR spectra of compounds 1–4 before and after color change.

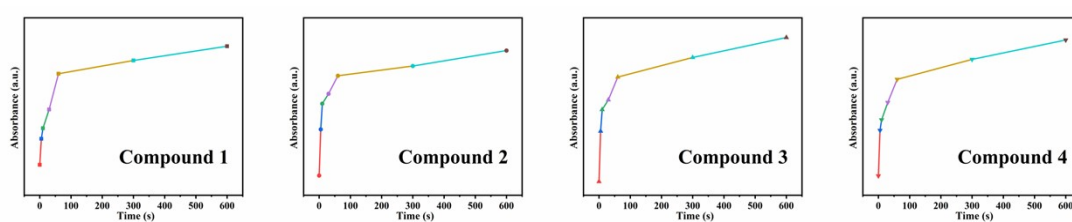

**Fig. S15.** Line chart of UV peak intensity along with irradiation time of compounds 1–4 (1–610 nm, 2–625 nm, 3–628 nm and 4–614 nm).

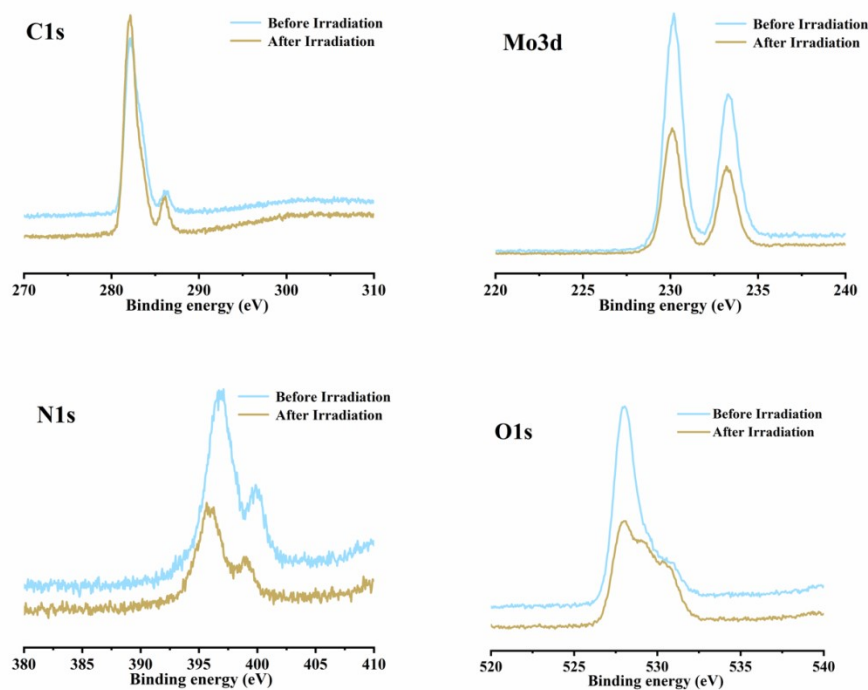

**Fig. S16.** XPS energy spectrum before irradiation (blue line) and after irradiation (yellow line) of compound 1.

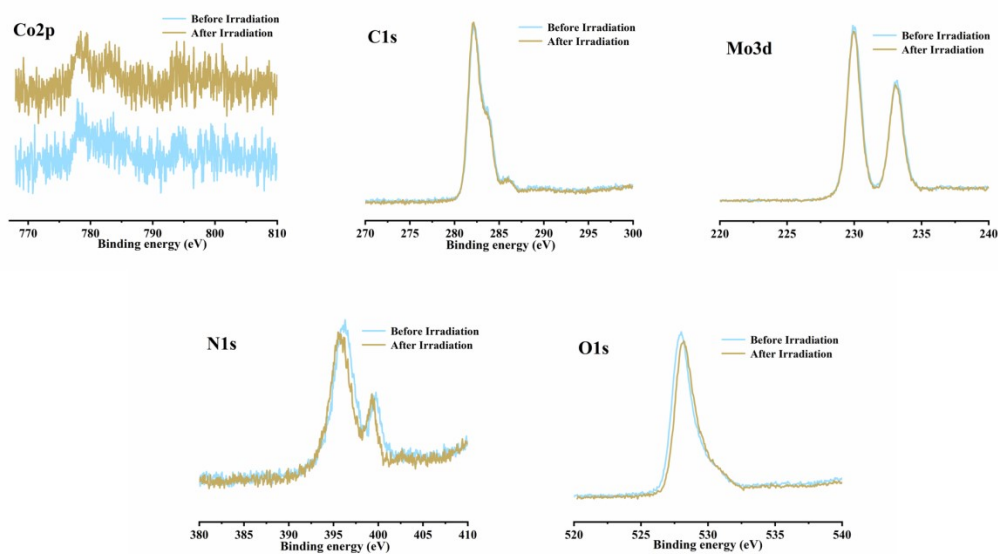

**Fig. S17.** XPS energy spectrum before irradiation (blue line) and after irradiation (yellow line) of compound 2.

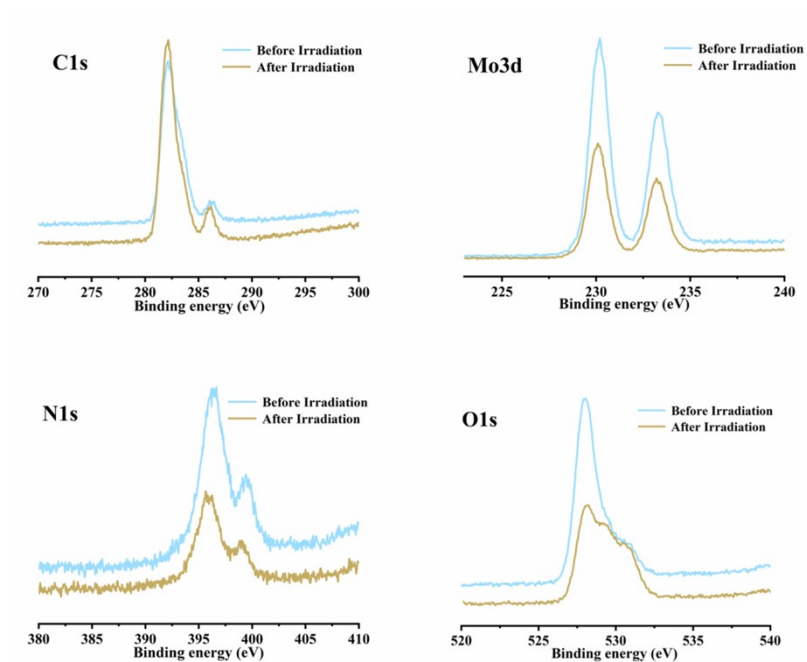

**Fig. S18.** XPS energy spectrum before irradiation (blue line) and after irradiation (yellow line) of compound **3**.

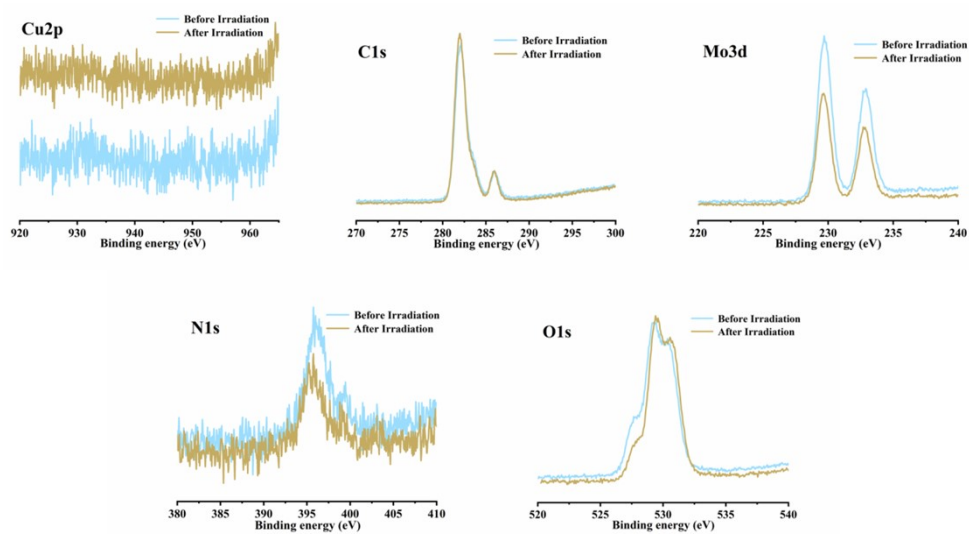

**Fig. S19.** XPS energy spectrum before irradiation (blue line) and after irradiation (yellow line) of compound **4**.

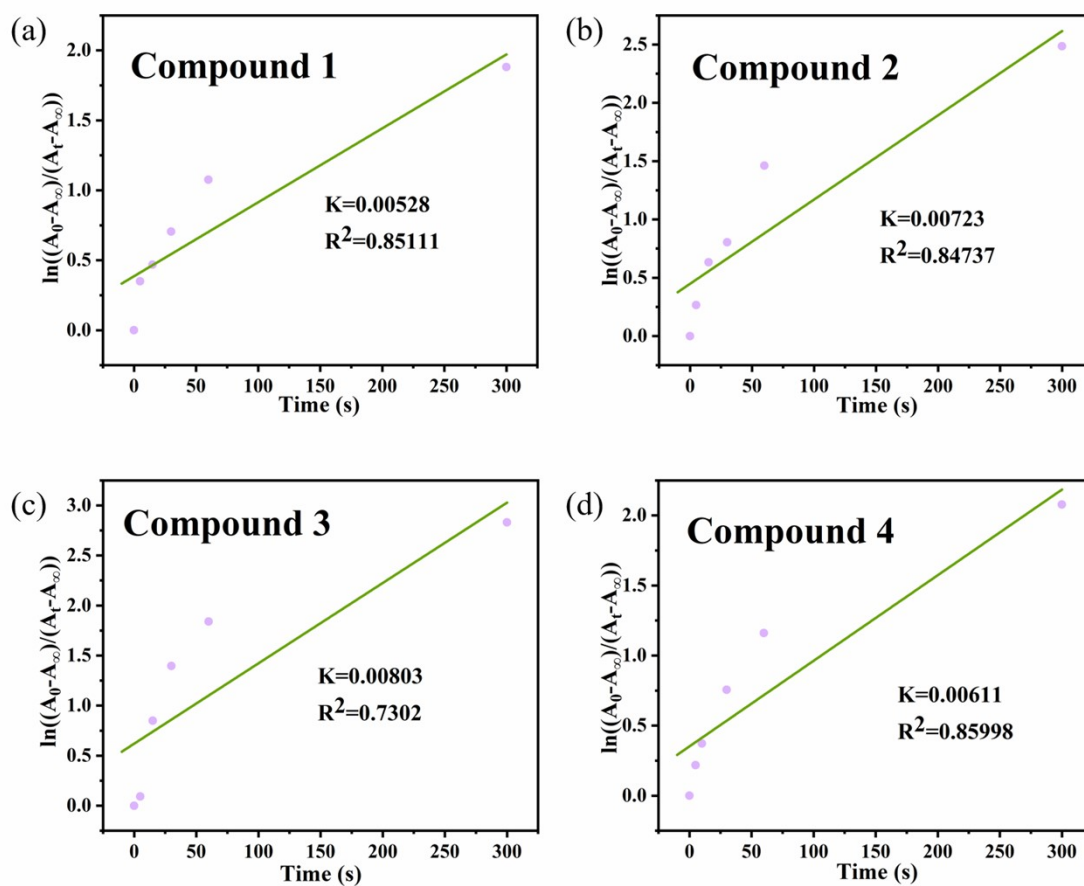

**Fig. S20.** Photochemical reaction kinetic plots of compound 1 (a), 2 (b), 3 (c) and 4 (d) monitored at 510, at 525, at 528 and at 514 nm, respectively.

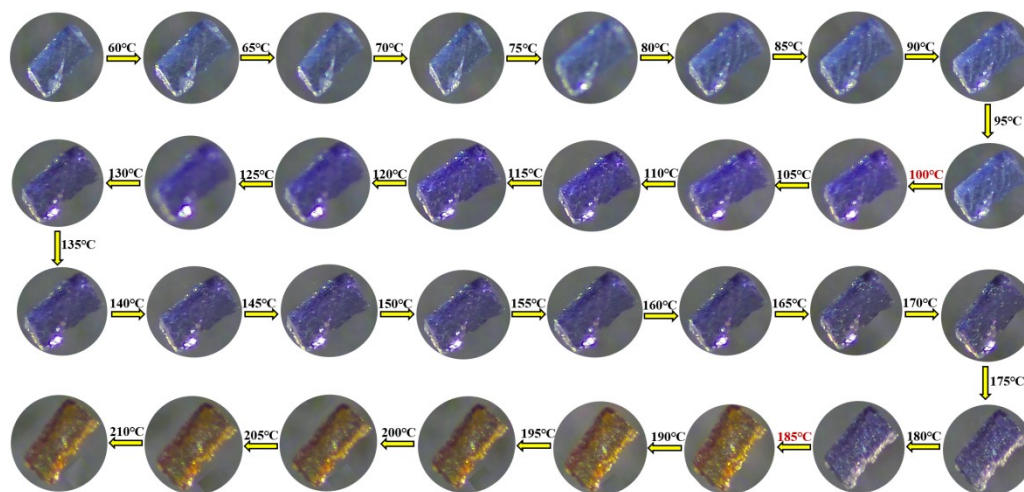

**Fig. S21.** Color change of compound 4 before and after heating.

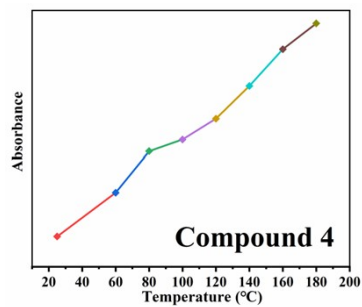

**Figure S22.** Line chart of UV peak intensity along with changing temperature of compound **4** (4–614 nm).

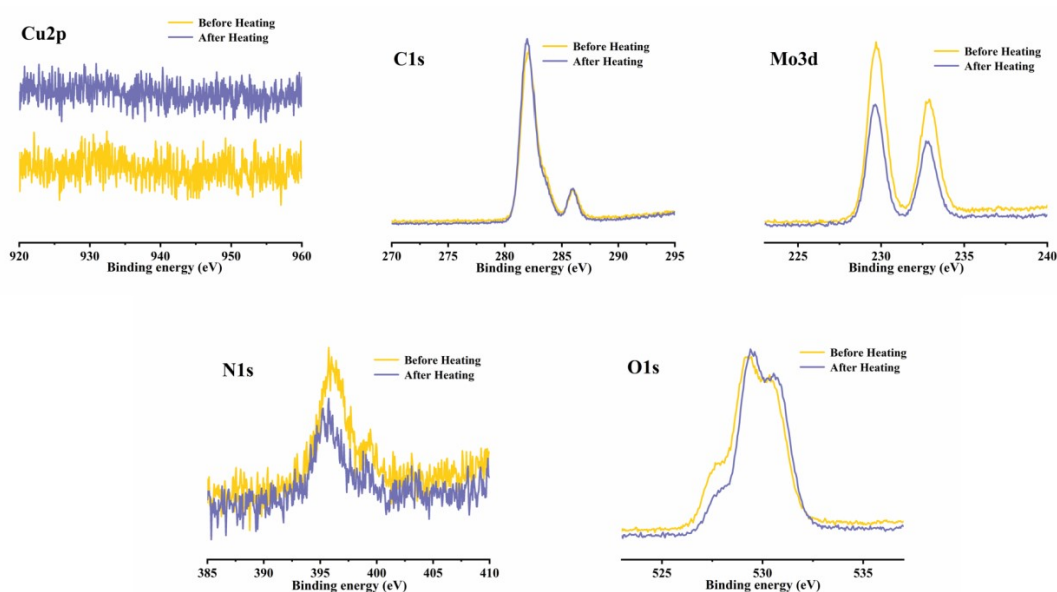

**Fig. S23.** XPS energy spectrum before heating (yellow line) and after irradiation (purple line) of compound **4**.

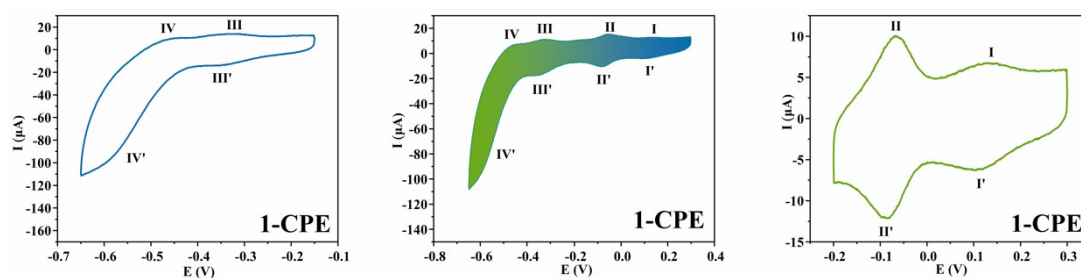

**Fig. S24.** Cyclic voltammograms of **1**-CPE in 0.1 M  $\text{H}_2\text{SO}_4$  + 0.5 M  $\text{Na}_2\text{SO}_4$  aqueous solution at  $20 \text{ mV} \cdot \text{s}^{-1}$  scan rates.



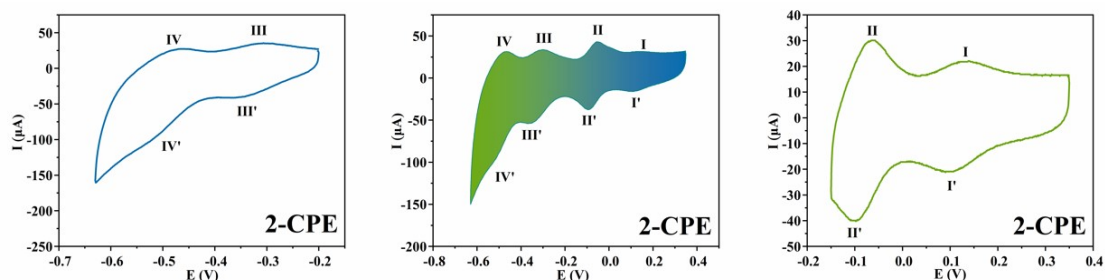

**Fig. S25.** Cyclic voltammograms of 2-CPE in 0.1 M  $\text{H}_2\text{SO}_4$  + 0.5 M  $\text{Na}_2\text{SO}_4$  aqueous solution at  $20 \text{ mV}\cdot\text{s}^{-1}$  scan rates.

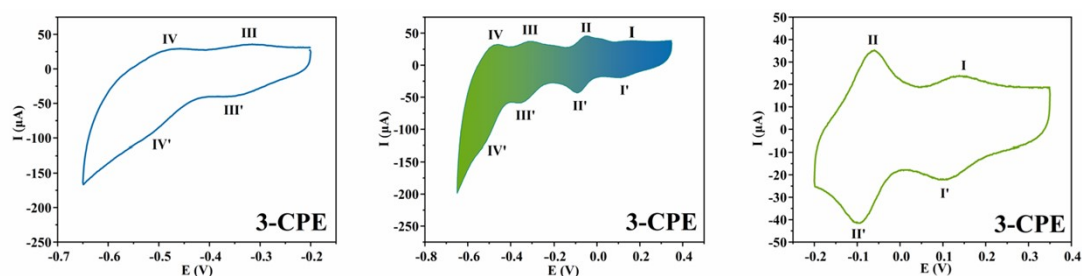

**Fig. S26.** Cyclic voltammograms of 3-CPE in 0.1 M  $\text{H}_2\text{SO}_4$  + 0.5 M  $\text{Na}_2\text{SO}_4$  aqueous solution at  $20 \text{ mV}\cdot\text{s}^{-1}$  scan rates.

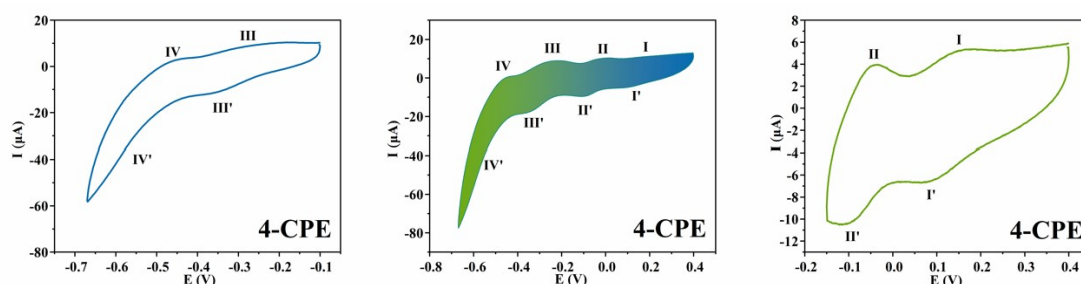

**Fig. S27.** Cyclic voltammograms of 4-CPE in 0.1 M  $\text{H}_2\text{SO}_4$  + 0.5 M  $\text{Na}_2\text{SO}_4$  aqueous solution at  $20 \text{ mV}\cdot\text{s}^{-1}$  scan rates.

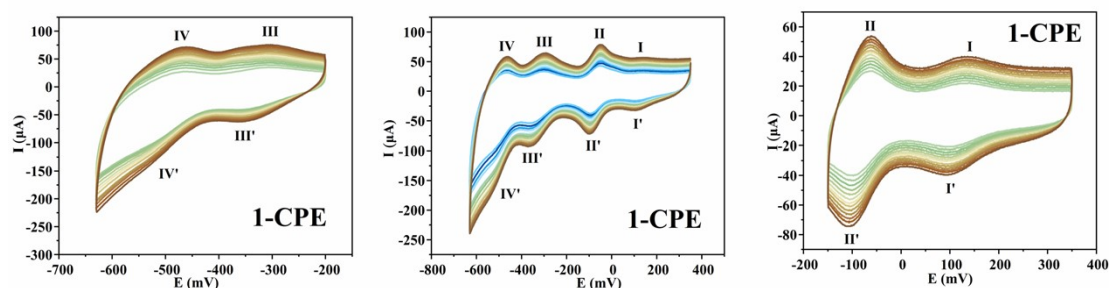

**Fig. S28.** Cyclic voltammograms of 1-CPE in 0.1 M  $\text{H}_2\text{SO}_4$  + 0.5 M  $\text{Na}_2\text{SO}_4$  aqueous solution at  $20 \text{ mV}\cdot\text{s}^{-1}$  scan rates.

solution at different scan rates ( $20\text{-}500\text{ mV}\cdot\text{s}^{-1}$ ).

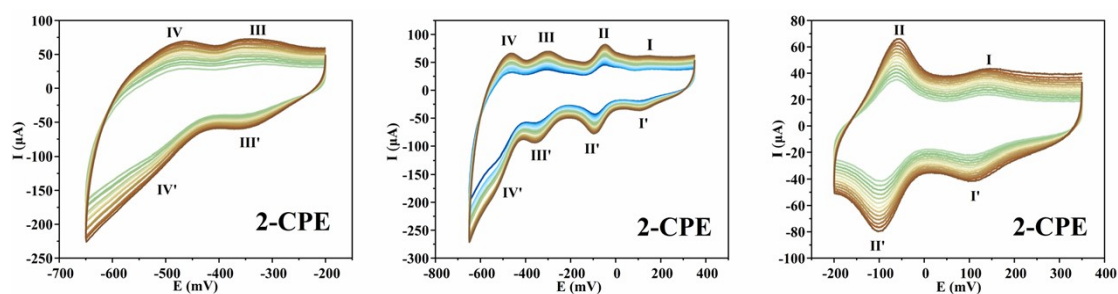

**Fig. S29.** Cyclic voltammograms of **2-CPE** in  $0.1\text{ M H}_2\text{SO}_4 + 0.5\text{ M Na}_2\text{SO}_4$  aqueous solution at different scan rates ( $20\text{-}500\text{ mV}\cdot\text{s}^{-1}$ ).

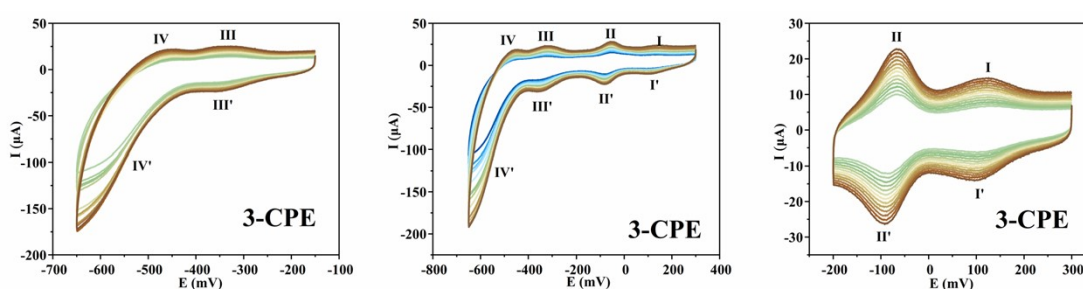

**Fig. S30.** Cyclic voltammograms of **3-CPE** in  $0.1\text{ M H}_2\text{SO}_4 + 0.5\text{ M Na}_2\text{SO}_4$  aqueous solution at different scan rates ( $20\text{-}500\text{ mV}\cdot\text{s}^{-1}$ ).

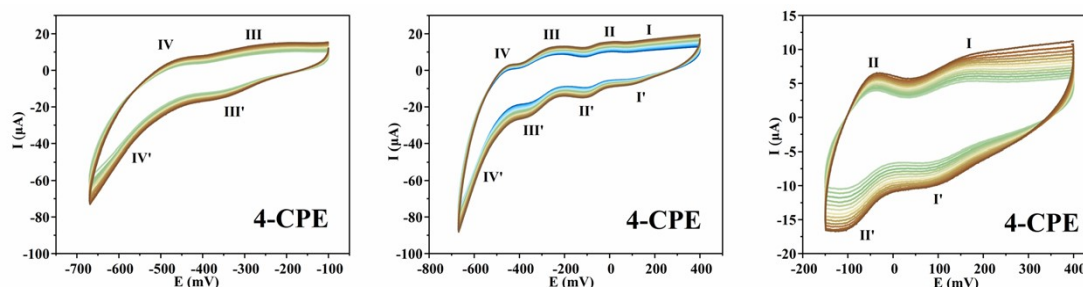

**Fig. S31.** Cyclic voltammograms of **4-CPE** in  $0.1\text{ M H}_2\text{SO}_4 + 0.5\text{ M Na}_2\text{SO}_4$  aqueous solution at different scan rates ( $20\text{-}500\text{ mV}\cdot\text{s}^{-1}$ ).



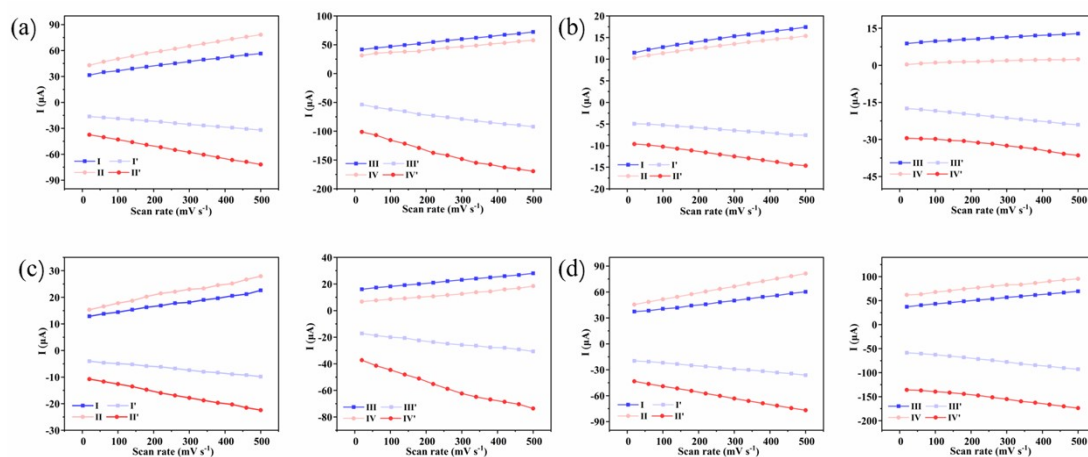

**Fig. S32.** (a-d) The plots of the anodic and cathodic peak currents vs scan rates of compounds 1–4.

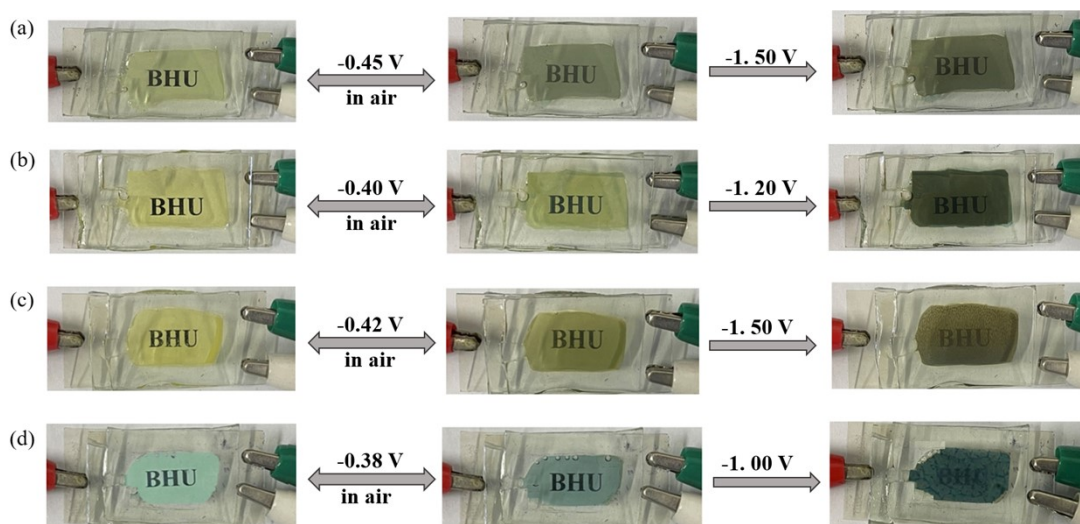

**Fig. S33.** (a-d) Color change of 1/2/3/4-ECD under voltage application.

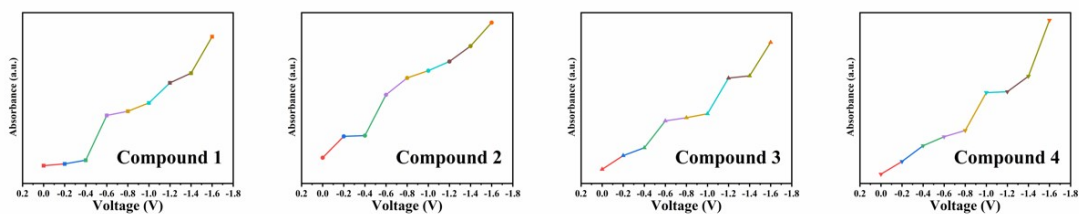

**Fig. S34.** Line chart of UV peak intensity along with applied voltage of compounds 1–4 (1–610 nm, 2–625 nm, 3–628 nm and 4–614 nm).

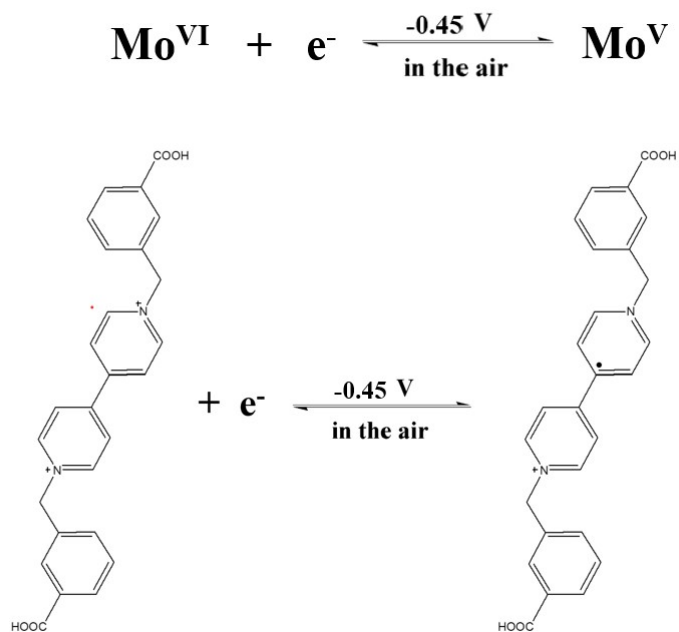

**Fig. S35.** The electron transfer reactions of compound **1** in redox process.

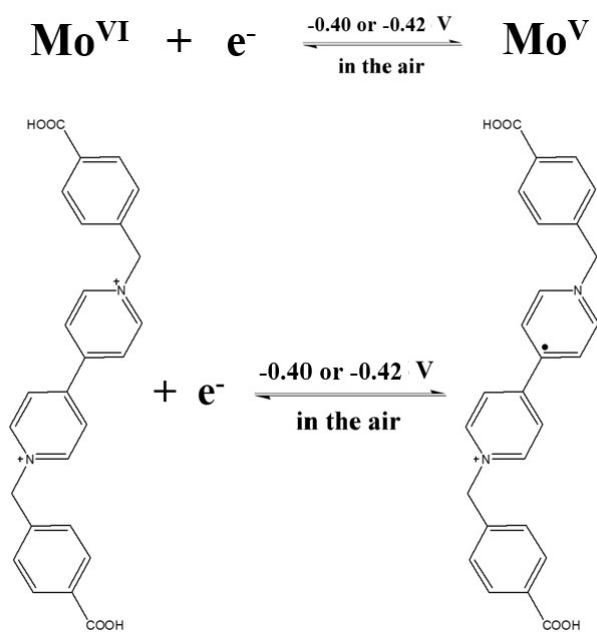

**Fig. S36.** The electron transfer reactions of compounds **2** and **3** in redox process.

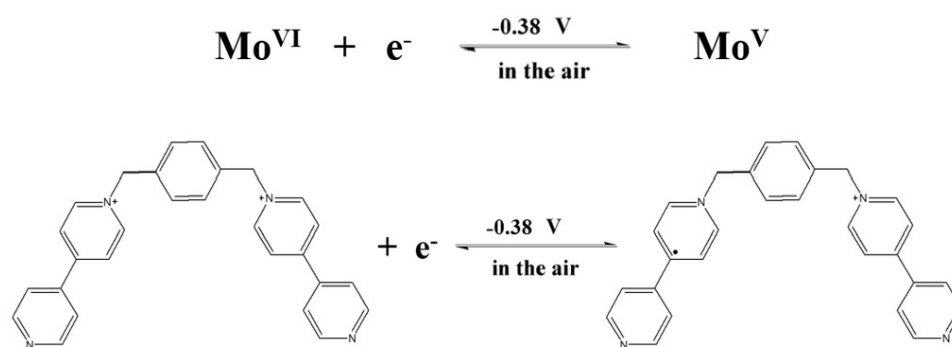

**Fig. S37.** The electron transfer reactions of compound **4** in redox process.

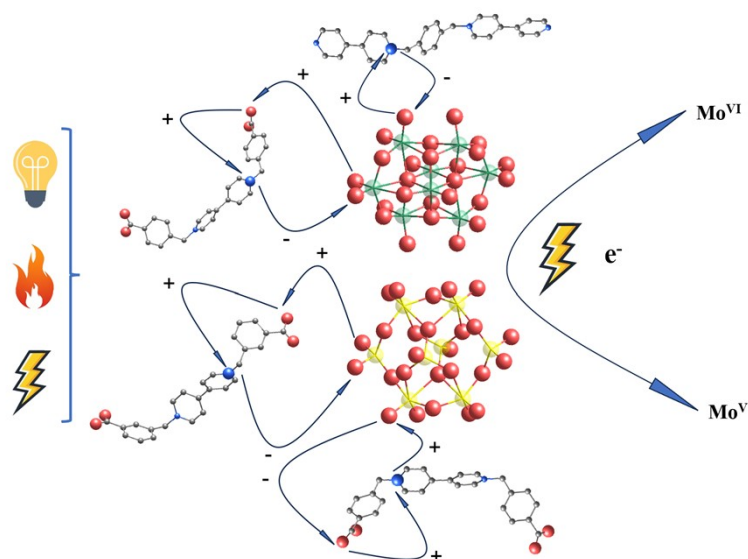

**Fig. S38.** The ET process of compounds **1–4**.

**Table. S2.** Selected bond lengths (Å) for compounds **1–4**.

| Compound <b>1</b> |                  |          |     |     |          |
|-------------------|------------------|----------|-----|-----|----------|
| Mo3               | O14              | 1.795(2) | C15 | C11 | 1.485(5) |
| Mo3               | O12              | 1.776(2) | C15 | C14 | 1.384(5) |
| Mo3               | O7               | 1.770(2) | C10 | C11 | 1.387(5) |
| Mo3               | O13              | 1.700(2) | C10 | C9  | 1.370(5) |
| Mo1               | O16 <sup>l</sup> | 1.932(2) | C16 | C17 | 1.370(5) |
| Mo1               | O14 <sup>l</sup> | 2.352(2) | C11 | C12 | 1.385(5) |
| Mo1               | O8               | 1.923(2) | C14 | C18 | 1.363(5) |
| Mo1               | O6               | 1.695(2) | O2  | C1  | 1.197(5) |
| Mo1               | O5               | 1.698(2) | C7  | C6  | 1.383(5) |
| Mo1               | O7               | 2.333(2) | C7  | C8  | 1.504(5) |
| Mo4               | O16              | 1.891(2) | C7  | C4  | 1.373(5) |
| Mo4               | O14              | 2.352(2) | C2  | C4  | 1.388(5) |
| Mo4               | O11              | 1.910(2) | C2  | C3  | 1.382(5) |

|     |                  |          |     |     |          |
|-----|------------------|----------|-----|-----|----------|
| Mo4 | O12 <sup>1</sup> | 2.422(2) | C2  | C1  | 1.481(5) |
| Mo4 | O17              | 1.699(3) | C6  | C5  | 1.389(5) |
| Mo4 | O15              | 1.702(3) | C12 | C13 | 1.357(6) |
| O8  | Mo2              | 1.876(2) | C19 | C20 | 1.512(6) |
| O11 | Mo2              | 1.886(3) | C20 | C21 | 1.366(6) |
| O10 | Mo2              | 1.697(3) | C20 | C25 | 1.388(6) |
| N2  | C17              | 1.338(5) | C5  | C3  | 1.377(5) |
| N2  | C18              | 1.337(5) | O4  | C26 | 1.323(7) |
| N2  | C19              | 1.480(5) | O3  | C26 | 1.169(7) |
| N1  | C9               | 1.339(4) | C21 | C22 | 1.374(7) |
| N1  | C8               | 1.504(5) | C25 | C24 | 1.375(7) |
| N1  | C13              | 1.341(5) | C26 | C22 | 1.526(7) |
| O9  | Mo2              | 1.684(3) | C23 | C22 | 1.367(7) |
| O1  | C1               | 1.334(5) | C23 | C24 | 1.397(7) |
| C15 | C16              | 1.383(5) |     |     |          |

Symmetry codes for **1**: <sup>1</sup>-X,2-Y,1-Z.

Compound **2**

|       |                    |           |       |                    |          |
|-------|--------------------|-----------|-------|--------------------|----------|
| Mo(2) | Mo(1)              | 3.2098(4) | Co(1) | O(2)               | 2.119(3) |
| Mo(2) | Mo(1) <sup>1</sup> | 3.2097(4) | Co(1) | O(2) <sup>5</sup>  | 2.119(3) |
| Mo(2) | O(5) <sup>1</sup>  | 1.943(3)  | Co(1) | O(2) <sup>4</sup>  | 2.119(3) |
| Mo(2) | O(5)               | 1.943(3)  | Co(1) | O(2) <sup>1</sup>  | 2.119(3) |
| Mo(2) | O(10)              | 2.125(3)  | O(2)  | C(1)               | 1.250(5) |
| Mo(2) | O(10) <sup>2</sup> | 2.374(3)  | N(1)  | C(9)               | 1.347(6) |
| Mo(2) | O(12)              | 1.754(4)  | N(1)  | C(13)              | 1.333(6) |
| Mo(2) | O(11)              | 1.683(4)  | N(1)  | C(8)               | 1.483(5) |
| Mo(1) | O(5)               | 1.999(3)  | O(1)  | C(1)               | 1.243(5) |
| Mo(1) | O(5) <sup>3</sup>  | 2.362(3)  | C(11) | C(11) <sup>3</sup> | 1.477(8) |
| Mo(1) | O(10)              | 2.3198(6) | C(11) | C(10)              | 1.386(6) |
| Mo(1) | O(6)               | 1.886(3)  | C(11) | C(12)              | 1.382(6) |
| Mo(1) | O(7)               | 1.690(3)  | C(9)  | C(10)              | 1.373(6) |
| Mo(1) | O(4)               | 1.698(3)  | C(1)  | C(2)               | 1.496(6) |
| Mo(3) | O(10)              | 2.487(3)  | C(7)  | C(2)               | 1.386(6) |
| Mo(3) | O(12) <sup>2</sup> | 2.290(4)  | C(7)  | C(6)               | 1.389(6) |
| Mo(3) | O(6) <sup>1</sup>  | 1.915(3)  | C(4)  | C(5)               | 1.375(6) |
| Mo(3) | O(6)               | 1.915(3)  | C(4)  | C(3)               | 1.378(6) |
| Mo(3) | O(9)               | 1.686(5)  | C(2)  | C(3)               | 1.381(6) |
| Mo(3) | O(8)               | 1.701(5)  | C(6)  | C(5)               | 1.383(6) |
| Co(1) | O(3) <sup>4</sup>  | 2.085(4)  | C(5)  | C(8)               | 1.506(6) |
| Co(1) | O(3)               | 2.085(4)  | C(13) | C(12)              | 1.376(7) |

Symmetry codes for **2**: <sup>1</sup>+X,1-Y,+Z; <sup>2</sup>1-X,1-Y,-Z; <sup>3</sup>1-X,+Y,-Z; <sup>4</sup>-X,1-Y,1-Z; <sup>5</sup>-X,+Y,1-Z.

Compound **3**

|     |     |          |     |     |          |
|-----|-----|----------|-----|-----|----------|
| Mo4 | O8  | 1.758(4) | N1  | C13 | 1.345(9) |
| Mo4 | O10 | 1.679(5) | C11 | C12 | 1.411(9) |
| Mo4 | O9  | 1.773(5) | C11 | C10 | 1.368(8) |

|     |                  |           |     |     |           |
|-----|------------------|-----------|-----|-----|-----------|
| Mo4 | O13              | 1.790(4)  | C11 | C14 | 1.475(8)  |
| Mo1 | O14              | 1.945(4)  | C12 | C13 | 1.369(10) |
| Mo1 | O16              | 1.921(4)  | C5  | C6  | 1.388(9)  |
| Mo1 | O17              | 1.693(4)  | C5  | C4  | 1.391(9)  |
| Mo1 | O15              | 1.684(4)  | C5  | C8  | 1.503(9)  |
| Mo1 | O9 <sup>1</sup>  | 2.303(4)  | C20 | C21 | 1.403(9)  |
| Mo1 | O13              | 2.335(4)  | C20 | C19 | 1.516(9)  |
| Mo3 | O16 <sup>1</sup> | 1.905(4)  | C20 | C25 | 1.363(8)  |
| Mo3 | O7               | 1.936(4)  | C10 | C9  | 1.366(9)  |
| Mo3 | O8               | 2.381(4)  | C14 | C15 | 1.391(8)  |
| Mo3 | O5               | 1.693(5)  | C14 | C18 | 1.375(9)  |
| Mo3 | O6               | 1.680(4)  | O3  | C26 | 1.308(9)  |
| Mo3 | O13 <sup>1</sup> | 2.380(4)  | C15 | C16 | 1.370(9)  |
| Mo2 | O14              | 1.852(4)  | C21 | C22 | 1.384(10) |
| Mo2 | O7               | 1.853(4)  | C6  | C7  | 1.345(10) |
| Mo2 | O11              | 1.691(5)  | C4  | C3  | 1.409(9)  |
| Mo2 | O12              | 1.693(5)  | C1  | C2  | 1.523(10) |
| N2  | C16              | 1.343(8)  | C25 | C24 | 1.372(9)  |
| N2  | C19              | 1.501(8)  | C23 | C24 | 1.384(9)  |
| N2  | C17              | 1.331(8)  | C23 | C26 | 1.504(10) |
| O2  | C1               | 1.304(10) | C23 | C22 | 1.384(9)  |
| O1  | C1               | 1.194(9)  | C17 | C18 | 1.353(9)  |
| O4  | C26              | 1.193(9)  | C3  | C2  | 1.378(10) |
| N1  | C9               | 1.315(8)  | C2  | C7  | 1.361(10) |
| N1  | C8               | 1.514(8)  |     |     |           |

Symmetry codes for **3**: <sup>1</sup>2-X,<sup>2</sup>Y,<sup>1</sup>Z.

Compound **4**

|      |                  |           |      |                   |           |
|------|------------------|-----------|------|-------------------|-----------|
| Mo6  | Mo5              | 3.2187(6) | Mo16 | O13               | 1.692(5)  |
| Mo6  | Mo7              | 3.2179(6) | Mo2  | O46               | 2.359(4)  |
| Mo6  | O36              | 1.948(3)  | Mo2  | O40 <sup>2</sup>  | 2.369(5)  |
| Mo6  | O33              | 2.147(3)  | Mo2  | O47               | 1.828(5)  |
| Mo6  | O33 <sup>1</sup> | 2.380(4)  | Mo2  | O51               | 1.982(5)  |
| Mo6  | O32              | 1.952(3)  | Mo2  | O49               | 1.624(6)  |
| Mo6  | O38              | 1.746(3)  | Mo2  | O52               | 1.773(6)  |
| Mo6  | O35              | 1.685(4)  | Cu1  | N5                | 2.027(4)  |
| Mo5  | O36 <sup>1</sup> | 2.342(4)  | Cu1  | N1 <sup>3</sup>   | 2.036(4)  |
| Mo5  | O33              | 2.319(3)  | Cu1  | O53               | 2.389(4)  |
| Mo5  | O32              | 1.989(3)  | Cu1  | N4                | 2.010(4)  |
| Mo5  | O28              | 1.899(3)  | Cu1  | N7                | 2.039(4)  |
| Mo5  | O27              | 1.707(4)  | O46  | Mo1A              | 2.235(12) |
| Mo5  | O30              | 1.704(4)  | O45  | Mo1A <sup>2</sup> | 2.307(8)  |
| Mo13 | Mo11             | 3.2005(7) | O40  | Mo2A <sup>2</sup> | 2.162(7)  |
| Mo13 | O14              | 2.382(4)  | O41  | Mo1A              | 2.169(17) |
| Mo13 | O23              | 1.966(4)  | N5   | C43               | 1.346(6)  |

|      |                  |           |     |      |           |
|------|------------------|-----------|-----|------|-----------|
| Mo13 | O10              | 1.949(4)  | N5  | C44  | 1.324(7)  |
| Mo13 | O19              | 2.130(4)  | N1  | C5   | 1.334(7)  |
| Mo13 | O22              | 1.677(4)  | N1  | C1   | 1.323(7)  |
| Mo13 | O17              | 1.749(4)  | N4  | C28  | 1.343(6)  |
| Mo7  | O36              | 1.990(3)  | N4  | C24  | 1.330(6)  |
| Mo7  | O33              | 2.335(3)  | O47 | Mo1A | 1.66(2)   |
| Mo7  | O32 <sup>1</sup> | 2.355(4)  | O47 | Mo2A | 2.150(11) |
| Mo7  | O34              | 1.902(3)  | N7  | C30  | 1.341(6)  |
| Mo7  | O39              | 1.706(4)  | N7  | C29  | 1.338(6)  |
| Mo7  | O37              | 1.685(4)  | N2  | C10  | 1.312(7)  |
| Mo4  | Mo1              | 3.213(4)  | N2  | C11  | 1.495(6)  |
| Mo4  | O46 <sup>2</sup> | 2.340(4)  | N2  | C6   | 1.339(7)  |
| Mo4  | O46              | 2.147(4)  | N8  | C37  | 1.341(6)  |
| Mo4  | O45              | 1.948(4)  | N8  | C38  | 1.337(6)  |
| Mo4  | O40              | 1.741(4)  | N8  | C39  | 1.499(6)  |
| Mo4  | O43              | 1.704(4)  | O51 | Mo2A | 1.767(7)  |
| Mo4  | O41              | 1.942(4)  | O42 | Mo1A | 1.824(14) |
| Mo8  | O33              | 2.445(3)  | C2  | C3   | 1.372(7)  |
| Mo8  | O38 <sup>1</sup> | 2.275(4)  | C2  | C1   | 1.391(7)  |
| Mo8  | O28              | 1.924(4)  | O44 | Mo1A | 1.743(10) |
| Mo8  | O34              | 1.910(4)  | C49 | C51  | 1.353(7)  |
| Mo8  | O29              | 1.705(3)  | C49 | C48  | 1.390(7)  |
| Mo8  | O31              | 1.705(4)  | N6  | C51  | 1.327(7)  |
| Mo12 | Mo15             | 3.2047(7) | N6  | C53  | 1.501(7)  |
| Mo12 | O14              | 2.126(4)  | N6  | C52  | 1.338(7)  |
| Mo12 | O18              | 1.953(4)  | O49 | Mo2A | 1.980(12) |
| Mo12 | O19              | 2.370(4)  | C43 | C46  | 1.367(7)  |
| Mo12 | O4               | 1.938(4)  | C26 | C21  | 1.486(7)  |
| Mo12 | O9               | 1.754(4)  | C26 | C25  | 1.356(7)  |
| Mo12 | O11              | 1.693(4)  | C26 | C27  | 1.381(8)  |
| Mo1  | Mo2              | 3.216(7)  | C3  | C8   | 1.479(6)  |
| Mo1  | O46              | 2.405(6)  | C3  | C4   | 1.367(7)  |
| Mo1  | O45 <sup>2</sup> | 2.337(5)  | C46 | C47  | 1.373(7)  |
| Mo1  | O41              | 1.943(6)  | C5  | C4   | 1.379(6)  |
| Mo1  | O47              | 1.979(7)  | C44 | C45  | 1.381(7)  |
| Mo1  | O42              | 1.641(7)  | C30 | C32  | 1.378(7)  |
| Mo1  | O44              | 1.690(5)  | C47 | C45  | 1.383(6)  |
| Mo10 | O23              | 1.984(4)  | C47 | C48  | 1.494(7)  |
| Mo10 | O18              | 2.318(4)  | C33 | C34  | 1.483(7)  |
| Mo10 | O19              | 2.351(3)  | C33 | C32  | 1.368(7)  |
| Mo10 | O21              | 1.885(4)  | C33 | C31  | 1.388(7)  |
| Mo10 | O26              | 1.702(4)  | C35 | C37  | 1.355(7)  |
| Mo10 | O25              | 1.700(4)  | C35 | C34  | 1.400(7)  |
| Mo11 | O10              | 1.980(4)  | C38 | C36  | 1.358(7)  |

|      |                  |          |     |                  |           |
|------|------------------|----------|-----|------------------|-----------|
| Mo11 | O19              | 2.357(3) | C10 | C9               | 1.364(7)  |
| Mo11 | O4               | 2.387(4) | C34 | C36              | 1.387(7)  |
| Mo11 | O5               | 1.911(4) | C8  | C7               | 1.382(7)  |
| Mo11 | O6               | 1.686(4) | C8  | C9               | 1.379(7)  |
| Mo11 | O1               | 1.703(4) | C7  | C6               | 1.369(7)  |
| Mo15 | O14              | 2.325(4) | C48 | C50              | 1.375(8)  |
| Mo15 | O10              | 2.374(4) | C31 | C29              | 1.379(7)  |
| Mo15 | O4               | 1.980(4) | C15 | C16              | 1.381(9)  |
| Mo15 | O8               | 1.897(5) | C15 | C14              | 1.376(9)  |
| Mo15 | O2               | 1.696(4) | C15 | C18              | 1.503(9)  |
| Mo15 | O3               | 1.699(4) | C28 | C27              | 1.396(7)  |
| Mo3  | O46              | 2.323(3) | C11 | C12              | 1.495(8)  |
| Mo3  | O45              | 2.002(4) | C12 | C13              | 1.377(8)  |
| Mo3  | O41 <sup>2</sup> | 2.332(4) | C12 | C17              | 1.380(8)  |
| Mo3  | O51              | 1.888(4) | N3  | C19              | 1.323(8)  |
| Mo3  | O48              | 1.696(5) | N3  | C18              | 1.494(7)  |
| Mo3  | O50              | 1.702(5) | N3  | C23              | 1.299(9)  |
| Mo14 | O14              | 2.363(4) | C21 | C20              | 1.372(9)  |
| Mo14 | O23              | 2.331(4) | C21 | C22              | 1.361(9)  |
| Mo14 | O18              | 1.995(4) | C40 | C42              | 1.389(8)  |
| Mo14 | O16              | 1.897(4) | C40 | C39              | 1.494(7)  |
| Mo14 | O15              | 1.691(4) | C40 | C41              | 1.389(8)  |
| Mo14 | O24              | 1.695(4) | C24 | C25              | 1.376(7)  |
| Mo9  | O19              | 2.392(4) | C55 | C54              | 1.375(8)  |
| Mo9  | O9               | 2.272(4) | C55 | C56              | 1.390(8)  |
| Mo9  | O21              | 1.944(4) | C16 | C17              | 1.375(9)  |
| Mo9  | O5               | 1.912(4) | O52 | Mo2A             | 1.435(10) |
| Mo9  | O20              | 1.697(4) | C42 | C41 <sup>4</sup> | 1.371(8)  |
| Mo9  | O7               | 1.697(5) | C53 | C54              | 1.501(8)  |
| Mo16 | O14              | 2.457(4) | C54 | C56 <sup>5</sup> | 1.378(8)  |
| Mo16 | O17              | 2.280(4) | C50 | C52              | 1.367(8)  |
| Mo16 | O16              | 1.920(4) | C19 | C20              | 1.377(8)  |
| Mo16 | O8               | 1.917(4) | C13 | C14              | 1.359(9)  |
| Mo16 | O12              | 1.689(5) | C22 | C23              | 1.401(10) |

Symmetry codes for **4**: <sup>1</sup>2-X,-Y,2-Z; <sup>2</sup>-1-X,-Y,1-Z; <sup>3</sup>-1+X,+Y,-1+Z; <sup>4</sup>-1-X,1-Y,1-Z; <sup>5</sup>1-X,-Y,-Z.

**Table. S3.** Selected bond angles (°) for compounds **1–4**.

| Compound <b>1</b> |     |     |            |     |     |     |          |
|-------------------|-----|-----|------------|-----|-----|-----|----------|
| O12               | Mo3 | O14 | 110.12(11) | C13 | N1  | C8  | 119.1(3) |
| O7                | Mo3 | O14 | 109.36(12) | C16 | C15 | C11 | 120.7(3) |
| O7                | Mo3 | O12 | 109.40(11) | C16 | C15 | C14 | 118.4(3) |
| O13               | Mo3 | O14 | 108.97(12) | C14 | C15 | C11 | 120.8(3) |
| O13               | Mo3 | O12 | 109.98(12) | C9  | C10 | C11 | 119.6(3) |

|                  |     |                  |            |     |     |     |            |
|------------------|-----|------------------|------------|-----|-----|-----|------------|
| O13              | Mo3 | O7               | 109.00(12) | C17 | C16 | C15 | 119.6(3)   |
| O16 <sup>1</sup> | Mo1 | O14 <sup>1</sup> | 72.22(8)   | C10 | C11 | C15 | 119.3(3)   |
| O16 <sup>1</sup> | Mo1 | O7               | 81.34(9)   | C12 | C11 | C15 | 122.3(3)   |
| O8               | Mo1 | O16 <sup>1</sup> | 147.34(10) | C12 | C11 | C10 | 118.3(3)   |
| O8               | Mo1 | O14 <sup>1</sup> | 80.15(9)   | N1  | C9  | C10 | 120.5(3)   |
| O8               | Mo1 | O7               | 75.36(10)  | C18 | C14 | C15 | 119.6(3)   |
| O6               | Mo1 | O16 <sup>1</sup> | 98.77(11)  | N2  | C17 | C16 | 120.6(3)   |
| O6               | Mo1 | O14 <sup>1</sup> | 163.20(11) | C6  | C7  | C8  | 119.7(4)   |
| O6               | Mo1 | O8               | 103.14(12) | C4  | C7  | C6  | 119.4(4)   |
| O6               | Mo1 | O5               | 105.23(12) | C4  | C7  | C8  | 120.9(3)   |
| O6               | Mo1 | O7               | 88.54(11)  | N2  | C18 | C14 | 121.0(3)   |
| O5               | Mo1 | O16 <sup>1</sup> | 99.36(11)  | C4  | C2  | C1  | 118.0(3)   |
| O5               | Mo1 | O14 <sup>1</sup> | 90.44(10)  | C3  | C2  | C4  | 119.8(3)   |
| O5               | Mo1 | O8               | 97.91(12)  | C3  | C2  | C1  | 122.3(4)   |
| O5               | Mo1 | O7               | 165.85(10) | C7  | C6  | C5  | 120.1(4)   |
| O7               | Mo1 | O14 <sup>1</sup> | 76.25(9)   | C7  | C8  | N1  | 110.7(3)   |
| O16              | Mo4 | O14              | 72.89(9)   | C13 | C12 | C11 | 120.0(4)   |
| O16              | Mo4 | O11              | 144.71(10) | N2  | C19 | C20 | 110.7(3)   |
| O16              | Mo4 | O12 <sup>1</sup> | 78.19(9)   | C21 | C20 | C19 | 120.1(4)   |
| O14              | Mo4 | O12 <sup>1</sup> | 75.87(8)   | C21 | C20 | C25 | 119.4(4)   |
| O11              | Mo4 | O14              | 80.58(9)   | C25 | C20 | C19 | 120.5(4)   |
| O11              | Mo4 | O12 <sup>1</sup> | 73.00(9)   | C3  | C5  | C6  | 120.2(4)   |
| O17              | Mo4 | O16              | 99.48(11)  | C7  | C4  | C2  | 120.8(3)   |
| O17              | Mo4 | O14              | 165.37(11) | N1  | C13 | C12 | 120.7(4)   |
| O17              | Mo4 | O11              | 100.69(12) | C5  | C3  | C2  | 119.7(4)   |
| O17              | Mo4 | O12 <sup>1</sup> | 90.47(11)  | O1  | C1  | C2  | 114.3(4)   |
| O17              | Mo4 | O15              | 104.82(14) | O2  | C1  | O1  | 122.3(4)   |
| O15              | Mo4 | O16              | 102.58(12) | O2  | C1  | C2  | 123.4(4)   |
| O15              | Mo4 | O14              | 89.21(12)  | C20 | C21 | C22 | 121.3(5)   |
| O15              | Mo4 | O11              | 99.85(12)  | C24 | C25 | C20 | 120.2(4)   |
| O15              | Mo4 | O12 <sup>1</sup> | 164.23(11) | O4  | C26 | C22 | 109.7(6)   |
| Mo4              | O16 | Mo1 <sup>1</sup> | 120.73(11) | O3  | C26 | O4  | 125.9(6)   |
| Mo3              | O14 | Mo1 <sup>1</sup> | 133.13(12) | O3  | C26 | C22 | 124.4(6)   |
| Mo3              | O14 | Mo4              | 132.95(12) | C22 | C23 | C24 | 120.6(5)   |
| Mo4              | O14 | Mo1 <sup>1</sup> | 89.86(7)   | C21 | C22 | C26 | 115.9(5)   |
| Mo2              | O8  | Mo1              | 126.56(13) | C23 | C22 | C21 | 119.3(4)   |
| Mo2              | O11 | Mo4              | 126.62(13) | C23 | C22 | C26 | 124.7(5)   |
| Mo3              | O12 | Mo4 <sup>1</sup> | 129.72(12) | C25 | C24 | C23 | 119.1(5)   |
| Mo3              | O7  | Mo1              | 130.72(12) | O8  | Mo2 | O11 | 135.06(10) |
| C17              | N2  | C19              | 120.3(3)   | O10 | Mo2 | O8  | 102.26(12) |
| C18              | N2  | C17              | 120.5(3)   | O10 | Mo2 | O11 | 105.77(12) |
| C18              | N2  | C19              | 119.2(3)   | O9  | Mo2 | O8  | 103.38(13) |
| C9               | N1  | C8               | 120.0(3)   | O9  | Mo2 | O11 | 101.76(13) |
| C9               | N1  | C13              | 120.9(3)   | O9  | Mo2 | O10 | 106.00(15) |



Symmetry codes for **1**: <sup>1</sup>-X,2-Y,1-Z.

| Compound <b>2</b>  |       |                    |            |                    |       |                    |            |
|--------------------|-------|--------------------|------------|--------------------|-------|--------------------|------------|
| Mo(1) <sup>1</sup> | Mo(2) | Mo(1)              | 91.153(16) | O(8)               | Mo(3) | O(10)              | 158.9(2)   |
| O(5) <sup>1</sup>  | Mo(2) | Mo(1)              | 124.93(8)  | O(8)               | Mo(3) | O(12) <sup>2</sup> | 90.2(2)    |
| O(5)               | Mo(2) | Mo(1)              | 36.07(7)   | O(8)               | Mo(3) | O(6)               | 103.04(9)  |
| O(5) <sup>1</sup>  | Mo(2) | Mo(1) <sup>1</sup> | 36.07(7)   | O(8)               | Mo(3) | O(6) <sup>1</sup>  | 103.04(9)  |
| O(5)               | Mo(2) | Mo(1) <sup>1</sup> | 124.93(8)  | O(3) <sup>4</sup>  | Co(1) | O(3)               | 180.0      |
| O(5) <sup>1</sup>  | Mo(2) | O(5)               | 150.36(15) | O(3) <sup>4</sup>  | Co(1) | O(2) <sup>4</sup>  | 92.43(12)  |
| O(5)               | Mo(2) | O(10)              | 78.71(8)   | O(3) <sup>4</sup>  | Co(1) | O(2)               | 87.57(12)  |
| O(5) <sup>1</sup>  | Mo(2) | O(10)              | 78.71(8)   | O(3) <sup>4</sup>  | Co(1) | O(2) <sup>1</sup>  | 87.57(11)  |
| O(5) <sup>1</sup>  | Mo(2) | O(10) <sup>2</sup> | 78.00(8)   | O(3)               | Co(1) | O(2) <sup>4</sup>  | 87.57(12)  |
| O(5)               | Mo(2) | O(10) <sup>2</sup> | 78.00(8)   | O(3)               | Co(1) | O(2) <sup>5</sup>  | 87.57(12)  |
| O(10)              | Mo(2) | Mo(1)              | 46.230(16) | O(3) <sup>4</sup>  | Co(1) | O(2) <sup>5</sup>  | 92.43(12)  |
| O(10) <sup>2</sup> | Mo(2) | Mo(1) <sup>1</sup> | 86.12(6)   | O(3)               | Co(1) | O(2)               | 92.43(12)  |
| O(10) <sup>2</sup> | Mo(2) | Mo(1)              | 86.12(6)   | O(3)               | Co(1) | O(2) <sup>1</sup>  | 92.43(12)  |
| O(10)              | Mo(2) | Mo(1) <sup>1</sup> | 46.229(16) | O(2) <sup>4</sup>  | Co(1) | O(2) <sup>1</sup>  | 83.78(19)  |
| O(10)              | Mo(2) | O(10) <sup>2</sup> | 75.69(14)  | O(2)               | Co(1) | O(2) <sup>4</sup>  | 180.00(14) |
| O(12)              | Mo(2) | Mo(1) <sup>1</sup> | 132.45(3)  | O(2)               | Co(1) | O(2) <sup>1</sup>  | 96.22(19)  |
| O(12)              | Mo(2) | Mo(1)              | 132.44(3)  | O(2) <sup>4</sup>  | Co(1) | O(2) <sup>5</sup>  | 96.22(19)  |
| O(12)              | Mo(2) | O(5) <sup>1</sup>  | 96.39(8)   | O(2) <sup>1</sup>  | Co(1) | O(2) <sup>5</sup>  | 180.00(15) |
| O(12)              | Mo(2) | O(5)               | 96.39(8)   | O(2)               | Co(1) | O(2) <sup>5</sup>  | 83.78(19)  |
| O(12)              | Mo(2) | O(10)              | 155.85(16) | Mo(2)              | O(5)  | Mo(1)              | 109.02(12) |
| O(12)              | Mo(2) | O(10) <sup>2</sup> | 80.16(15)  | Mo(2)              | O(5)  | Mo(1) <sup>3</sup> | 109.91(11) |
| O(11)              | Mo(2) | Mo(1)              | 90.76(10)  | Mo(1)              | O(5)  | Mo(1) <sup>3</sup> | 104.25(11) |
| O(11)              | Mo(2) | Mo(1) <sup>1</sup> | 90.76(10)  | Mo(2)              | O(10) | Mo(2) <sup>2</sup> | 104.31(14) |
| O(11)              | Mo(2) | O(5)               | 101.29(8)  | Mo(2)              | O(10) | Mo(1)              | 92.35(9)   |
| O(11)              | Mo(2) | O(5) <sup>1</sup>  | 101.29(8)  | Mo(2)              | O(10) | Mo(1) <sup>1</sup> | 92.35(9)   |
| O(11)              | Mo(2) | O(10) <sup>2</sup> | 175.54(17) | Mo(2) <sup>2</sup> | O(10) | Mo(3)              | 91.99(12)  |
| O(11)              | Mo(2) | O(10)              | 99.85(17)  | Mo(2)              | O(10) | Mo(3)              | 163.70(17) |
| O(11)              | Mo(2) | O(12)              | 104.3(2)   | Mo(1)              | O(10) | Mo(2) <sup>2</sup> | 97.64(8)   |
| O(5)               | Mo(1) | Mo(2)              | 34.91(7)   | Mo(1) <sup>1</sup> | O(10) | Mo(2) <sup>2</sup> | 97.64(8)   |
| O(5) <sup>3</sup>  | Mo(1) | Mo(2)              | 78.61(6)   | Mo(1) <sup>1</sup> | O(10) | Mo(1)              | 162.37(17) |
| O(5)               | Mo(1) | O(5) <sup>3</sup>  | 71.41(11)  | Mo(1) <sup>1</sup> | O(10) | Mo(3)              | 85.36(9)   |
| O(5)               | Mo(1) | O(10)              | 73.06(11)  | Mo(1)              | O(10) | Mo(3)              | 85.36(9)   |
| O(10)              | Mo(1) | Mo(2)              | 41.42(9)   | Mo(2)              | O(12) | Mo(3) <sup>2</sup> | 119.14(19) |
| O(10)              | Mo(1) | O(5) <sup>3</sup>  | 71.55(10)  | Mo(1)              | O(6)  | Mo(3)              | 118.11(14) |
| O(6)               | Mo(1) | Mo(2)              | 119.28(8)  | C(1)               | O(2)  | Co(1)              | 130.5(3)   |
| O(6)               | Mo(1) | O(5) <sup>3</sup>  | 84.18(11)  | C(9)               | N(1)  | C(8)               | 119.1(4)   |
| O(6)               | Mo(1) | O(5)               | 146.62(11) | C(13)              | N(1)  | C(9)               | 120.7(4)   |
| O(6)               | Mo(1) | O(10)              | 77.88(12)  | C(13)              | N(1)  | C(8)               | 120.2(4)   |
| O(7)               | Mo(1) | Mo(2)              | 85.79(10)  | C(10)              | C(11) | C(11) <sup>3</sup> | 120.9(5)   |
| O(7)               | Mo(1) | O(5)               | 96.87(13)  | C(12)              | C(11) | C(11) <sup>3</sup> | 121.1(5)   |
| O(7)               | Mo(1) | O(5) <sup>3</sup>  | 164.26(12) | C(12)              | C(11) | C(10)              | 118.0(4)   |
| O(7)               | Mo(1) | O(10)              | 95.31(13)  | N(1)               | C(9)  | C(10)              | 120.4(4)   |

|                    |       |                    |            |       |       |       |          |
|--------------------|-------|--------------------|------------|-------|-------|-------|----------|
| O(7)               | Mo(1) | O(6)               | 101.88(13) | O(2)  | C(1)  | C(2)  | 117.9(4) |
| O(7)               | Mo(1) | O(4)               | 105.15(16) | O(1)  | C(1)  | O(2)  | 124.6(4) |
| O(4)               | Mo(1) | Mo(2)              | 135.78(11) | O(1)  | C(1)  | C(2)  | 117.2(4) |
| O(4)               | Mo(1) | O(5)               | 100.87(13) | C(2)  | C(7)  | C(6)  | 119.9(4) |
| O(4)               | Mo(1) | O(5) <sup>3</sup>  | 87.75(13)  | C(5)  | C(4)  | C(3)  | 120.9(4) |
| O(4)               | Mo(1) | O(10)              | 159.30(15) | C(7)  | C(2)  | C(1)  | 120.2(4) |
| O(4)               | Mo(1) | O(6)               | 100.54(15) | C(3)  | C(2)  | C(1)  | 120.9(4) |
| O(12) <sup>2</sup> | Mo(3) | O(10)              | 68.71(12)  | C(3)  | C(2)  | C(7)  | 118.9(4) |
| O(6) <sup>1</sup>  | Mo(3) | O(10)              | 73.22(8)   | C(5)  | C(6)  | C(7)  | 120.9(4) |
| O(6)               | Mo(3) | O(10)              | 73.22(8)   | C(9)  | C(10) | C(11) | 120.1(4) |
| O(6) <sup>1</sup>  | Mo(3) | O(12) <sup>2</sup> | 77.42(9)   | C(4)  | C(5)  | C(6)  | 118.6(4) |
| O(6)               | Mo(3) | O(12) <sup>2</sup> | 77.42(9)   | C(4)  | C(5)  | C(8)  | 118.2(4) |
| O(6) <sup>1</sup>  | Mo(3) | O(6)               | 143.51(16) | C(6)  | C(5)  | C(8)  | 123.1(4) |
| O(9)               | Mo(3) | O(10)              | 94.62(19)  | C(4)  | C(3)  | C(2)  | 120.8(4) |
| O(9)               | Mo(3) | O(12) <sup>2</sup> | 163.3(2)   | N(1)  | C(13) | C(12) | 120.8(4) |
| O(9)               | Mo(3) | O(6)               | 98.29(10)  | C(13) | C(12) | C(11) | 120.0(4) |
| O(9)               | Mo(3) | O(6) <sup>1</sup>  | 98.28(10)  | N(1)  | C(8)  | C(5)  | 112.6(3) |
| O(9)               | Mo(3) | O(8)               | 106.5(3)   |       |       |       |          |

Symmetry codes for **2**: <sup>1</sup>+X,1-Y,+Z; <sup>2</sup>1-X,1-Y,-Z; <sup>3</sup>1-X,+Y,-Z; <sup>4</sup>-X,1-Y,1-Z; <sup>5</sup>-X,+Y,1-Z.

| Compound <b>3</b> |     |                  |            |     |     |                  |           |
|-------------------|-----|------------------|------------|-----|-----|------------------|-----------|
| O8                | Mo4 | O9               | 112.7(2)   | Mo4 | O9  | Mo1 <sup>1</sup> | 127.5(2)  |
| O8                | Mo4 | O13              | 108.7(2)   | C9  | N1  | C8               | 119.5(5)  |
| O10               | Mo4 | O8               | 107.5(2)   | C9  | N1  | C13              | 120.7(6)  |
| O10               | Mo4 | O9               | 107.5(3)   | C13 | N1  | C8               | 119.6(6)  |
| O10               | Mo4 | O13              | 108.7(3)   | C12 | C11 | C14              | 120.7(5)  |
| O9                | Mo4 | O13              | 111.6(2)   | C10 | C11 | C12              | 116.5(6)  |
| O14               | Mo1 | O9 <sup>1</sup>  | 75.09(17)  | C10 | C11 | C14              | 122.8(5)  |
| O14               | Mo1 | O13              | 82.62(17)  | C13 | C12 | C11              | 119.6(6)  |
| O16               | Mo1 | O14              | 149.90(18) | C6  | C5  | C4               | 119.9(6)  |
| O16               | Mo1 | O9 <sup>1</sup>  | 81.66(17)  | C6  | C5  | C8               | 119.9(6)  |
| O16               | Mo1 | O13              | 72.55(16)  | C4  | C5  | C8               | 120.2(6)  |
| O17               | Mo1 | O14              | 96.7(2)    | C21 | C20 | C19              | 121.5(6)  |
| O17               | Mo1 | O16              | 100.4(2)   | C25 | C20 | C21              | 118.5(6)  |
| O17               | Mo1 | O9 <sup>1</sup>  | 163.2(2)   | C25 | C20 | C19              | 120.0(6)  |
| O17               | Mo1 | O13              | 91.0(2)    | C9  | C10 | C11              | 121.6(6)  |
| O15               | Mo1 | O14              | 101.6(2)   | C15 | C14 | C11              | 122.1(5)  |
| O15               | Mo1 | O16              | 97.3(2)    | C18 | C14 | C11              | 122.0(5)  |
| O15               | Mo1 | O17              | 105.8(2)   | C18 | C14 | C15              | 115.9(6)  |
| O15               | Mo1 | O9 <sup>1</sup>  | 90.3(2)    | Mo4 | O13 | Mo1              | 137.8(2)  |
| O15               | Mo1 | O13              | 161.9(2)   | Mo4 | O13 | Mo3 <sup>1</sup> | 132.3(2)  |
| O9 <sup>1</sup>   | Mo1 | O13              | 73.6(2)    | Mo1 | O13 | Mo3 <sup>1</sup> | 89.75(15) |
| O16 <sup>1</sup>  | Mo3 | O7               | 146.36(17) | C16 | C15 | C14              | 120.8(6)  |
| O16 <sup>1</sup>  | Mo3 | O8               | 79.84(17)  | C22 | C21 | C20              | 120.2(6)  |
| O16 <sup>1</sup>  | Mo3 | O13 <sup>1</sup> | 71.73(16)  | C7  | C6  | C5               | 120.3(7)  |

|                  |     |                  |            |     |     |     |          |
|------------------|-----|------------------|------------|-----|-----|-----|----------|
| O7               | Mo3 | O8               | 76.42(17)  | N1  | C9  | C10 | 120.6(6) |
| O7               | Mo3 | O13 <sup>1</sup> | 78.93(16)  | N2  | C16 | C15 | 120.8(5) |
| O5               | Mo3 | O16 <sup>1</sup> | 101.0(2)   | N2  | C19 | C20 | 111.9(5) |
| O5               | Mo3 | O7               | 96.7(2)    | C5  | C4  | C3  | 118.0(6) |
| O5               | Mo3 | O8               | 166.3(2)   | O2  | C1  | C2  | 111.0(7) |
| O5               | Mo3 | O13 <sup>1</sup> | 93.3(2)    | O1  | C1  | O2  | 125.5(8) |
| O6               | Mo3 | O16 <sup>1</sup> | 102.3(2)   | O1  | C1  | C2  | 123.5(7) |
| O6               | Mo3 | O7               | 100.6(2)   | C20 | C25 | C24 | 121.9(6) |
| O6               | Mo3 | O8               | 88.7(2)    | C24 | C23 | C26 | 117.8(6) |
| O6               | Mo3 | O5               | 104.4(3)   | C22 | C23 | C24 | 119.7(6) |
| O6               | Mo3 | O13 <sup>1</sup> | 162.2(2)   | C22 | C23 | C26 | 122.5(6) |
| O13 <sup>1</sup> | Mo3 | O8               | 73.80(19)  | C25 | C24 | C23 | 119.8(6) |
| O14              | Mo2 | O7               | 130.95(18) | O4  | C26 | O3  | 124.7(7) |
| O11              | Mo2 | O14              | 108.1(2)   | O4  | C26 | C23 | 123.9(6) |
| O11              | Mo2 | O7               | 103.4(2)   | O3  | C26 | C23 | 111.4(7) |
| O11              | Mo2 | O12              | 106.7(3)   | N2  | C17 | C18 | 121.5(6) |
| O12              | Mo2 | O14              | 102.3(2)   | C23 | C22 | C21 | 119.9(6) |
| O12              | Mo2 | O7               | 103.5(2)   | C17 | C18 | C14 | 121.7(6) |
| Mo2              | O14 | Mo1              | 126.0(2)   | C5  | C8  | N1  | 111.6(5) |
| Mo3 <sup>1</sup> | O16 | Mo1              | 120.9(2)   | C2  | C3  | C4  | 120.7(6) |
| Mo2              | O7  | Mo3              | 131.9(2)   | N1  | C13 | C12 | 120.7(6) |
| Mo4              | O8  | Mo3              | 126.0(2)   | C3  | C2  | C1  | 122.7(6) |
| C16              | N2  | C19              | 120.2(5)   | C7  | C2  | C1  | 118.1(7) |
| C17              | N2  | C16              | 119.3(5)   | C7  | C2  | C3  | 119.2(6) |
| C17              | N2  | C19              | 120.4(5)   | C6  | C7  | C2  | 121.9(7) |

Symmetry codes for **3**: <sup>1</sup>2-X,<sup>2</sup>Y,<sup>1</sup>Z.

Compound **4**

|                  |     |                  |            |     |      |     |            |
|------------------|-----|------------------|------------|-----|------|-----|------------|
| Mo7              | Mo6 | Mo5              | 91.393(14) | O20 | Mo9  | O19 | 92.05(18)  |
| O36              | Mo6 | Mo5              | 124.56(9)  | O20 | Mo9  | O9  | 162.23(19) |
| O36              | Mo6 | Mo7              | 35.62(9)   | O20 | Mo9  | O21 | 97.5(2)    |
| O36              | Mo6 | O33 <sup>1</sup> | 77.59(13)  | O20 | Mo9  | O5  | 99.5(2)    |
| O36              | Mo6 | O33              | 78.54(13)  | O20 | Mo9  | O7  | 104.6(2)   |
| O36              | Mo6 | O32              | 149.66(14) | O7  | Mo9  | O19 | 163.3(2)   |
| O33 <sup>1</sup> | Mo6 | Mo5              | 86.18(8)   | O7  | Mo9  | O9  | 93.1(2)    |
| O33              | Mo6 | Mo5              | 46.05(9)   | O7  | Mo9  | O21 | 101.0(2)   |
| O33 <sup>1</sup> | Mo6 | Mo7              | 86.10(7)   | O7  | Mo9  | O5  | 102.1(2)   |
| O33              | Mo6 | Mo7              | 46.50(9)   | O17 | Mo16 | O14 | 69.93(13)  |
| O33              | Mo6 | O33 <sup>1</sup> | 76.19(14)  | O16 | Mo16 | O14 | 74.27(16)  |
| O32              | Mo6 | Mo5              | 35.63(9)   | O16 | Mo16 | O17 | 77.52(17)  |
| O32              | Mo6 | Mo7              | 124.74(9)  | O8  | Mo16 | O14 | 73.45(16)  |
| O32              | Mo6 | O33 <sup>1</sup> | 78.10(13)  | O8  | Mo16 | O17 | 78.18(17)  |
| O32              | Mo6 | O33              | 78.25(12)  | O8  | Mo16 | O16 | 144.63(19) |
| O38              | Mo6 | Mo5              | 132.33(11) | O12 | Mo16 | O14 | 94.2(2)    |
| O38              | Mo6 | Mo7              | 132.45(11) | O12 | Mo16 | O17 | 164.1(2)   |

|                  |      |                  |            |                  |      |                  |            |
|------------------|------|------------------|------------|------------------|------|------------------|------------|
| O38              | Mo6  | O36              | 96.84(15)  | O12              | Mo16 | O16              | 97.5(2)    |
| O38              | Mo6  | O33 <sup>1</sup> | 80.39(14)  | O12              | Mo16 | O8               | 98.9(2)    |
| O38              | Mo6  | O33              | 156.58(15) | O12              | Mo16 | O13              | 106.0(3)   |
| O38              | Mo6  | O32              | 96.72(15)  | O13              | Mo16 | O14              | 159.8(2)   |
| O35              | Mo6  | Mo5              | 90.24(13)  | O13              | Mo16 | O17              | 89.9(2)    |
| O35              | Mo6  | Mo7              | 90.01(13)  | O13              | Mo16 | O16              | 102.9(2)   |
| O35              | Mo6  | O36              | 101.30(17) | O13              | Mo16 | O8               | 102.3(2)   |
| O35              | Mo6  | O33 <sup>1</sup> | 174.65(14) | O46              | Mo2  | Mo1              | 48.17(13)  |
| O35              | Mo6  | O33              | 98.46(16)  | O46              | Mo2  | O40 <sup>2</sup> | 69.67(14)  |
| O35              | Mo6  | O32              | 101.21(17) | O40 <sup>2</sup> | Mo2  | Mo1              | 83.31(14)  |
| O35              | Mo6  | O38              | 104.96(17) | O47              | Mo2  | Mo1              | 33.82(16)  |
| O36 <sup>1</sup> | Mo5  | Mo6              | 78.54(8)   | O47              | Mo2  | O46              | 77.96(17)  |
| O33              | Mo5  | Mo6              | 41.80(7)   | O47              | Mo2  | O40 <sup>2</sup> | 77.67(17)  |
| O33              | Mo5  | O36 <sup>1</sup> | 71.77(12)  | O47              | Mo2  | O51              | 145.80(19) |
| O32              | Mo5  | Mo6              | 34.86(9)   | O51              | Mo2  | Mo1              | 122.45(17) |
| O32              | Mo5  | O36 <sup>1</sup> | 71.44(13)  | O51              | Mo2  | O46              | 74.31(16)  |
| O32              | Mo5  | O33              | 73.49(12)  | O51              | Mo2  | O40 <sup>2</sup> | 74.22(19)  |
| O28              | Mo5  | Mo6              | 119.49(11) | O49              | Mo2  | Mo1              | 90.9(3)    |
| O28              | Mo5  | O36 <sup>1</sup> | 83.57(14)  | O49              | Mo2  | O46              | 97.5(2)    |
| O28              | Mo5  | O33              | 77.70(13)  | O49              | Mo2  | O40 <sup>2</sup> | 166.6(2)   |
| O28              | Mo5  | O32              | 146.44(15) | O49              | Mo2  | O47              | 104.0(3)   |
| O27              | Mo5  | Mo6              | 135.06(13) | O49              | Mo2  | O51              | 99.1(2)    |
| O27              | Mo5  | O36 <sup>1</sup> | 87.90(17)  | O49              | Mo2  | O52              | 103.3(3)   |
| O27              | Mo5  | O33              | 159.68(18) | O52              | Mo2  | Mo1              | 136.0(2)   |
| O27              | Mo5  | O32              | 100.20(16) | O52              | Mo2  | O46              | 158.4(3)   |
| O27              | Mo5  | O28              | 100.90(16) | O52              | Mo2  | O40 <sup>2</sup> | 89.2(2)    |
| O30              | Mo5  | Mo6              | 87.03(14)  | O52              | Mo2  | O47              | 102.2(2)   |
| O30              | Mo5  | O36 <sup>1</sup> | 165.28(16) | O52              | Mo2  | O51              | 96.5(3)    |
| O30              | Mo5  | O33              | 95.53(17)  | N5               | Cu1  | N1 <sup>3</sup>  | 87.38(16)  |
| O30              | Mo5  | O32              | 98.24(16)  | N5               | Cu1  | O53              | 91.52(16)  |
| O30              | Mo5  | O28              | 101.33(17) | N5               | Cu1  | N7               | 176.81(18) |
| O30              | Mo5  | O27              | 104.6(2)   | N1 <sup>3</sup>  | Cu1  | O53              | 91.48(16)  |
| O14              | Mo13 | Mo11             | 86.32(9)   | N1 <sup>3</sup>  | Cu1  | N7               | 90.50(16)  |
| O23              | Mo13 | Mo11             | 125.70(11) | N4               | Cu1  | N5               | 90.72(15)  |
| O23              | Mo13 | O14              | 77.93(14)  | N4               | Cu1  | N1 <sup>3</sup>  | 178.09(16) |
| O23              | Mo13 | O19              | 78.28(15)  | N4               | Cu1  | O53              | 88.78(17)  |
| O10              | Mo13 | Mo11             | 35.77(12)  | N4               | Cu1  | N7               | 91.39(16)  |
| O10              | Mo13 | O14              | 77.65(14)  | N7               | Cu1  | O53              | 90.92(17)  |
| O10              | Mo13 | O23              | 150.21(15) | Mo6              | O36  | Mo5 <sup>1</sup> | 110.39(15) |
| O10              | Mo13 | O19              | 79.32(15)  | Mo6              | O36  | Mo7              | 109.61(16) |
| O19              | Mo13 | Mo11             | 47.43(9)   | Mo7              | O36  | Mo5 <sup>1</sup> | 104.39(14) |
| O19              | Mo13 | O14              | 75.56(14)  | Mo6              | O33  | Mo6 <sup>1</sup> | 103.81(13) |
| O22              | Mo13 | Mo11             | 90.15(15)  | Mo6              | O33  | Mo5              | 92.16(11)  |
| O22              | Mo13 | O14              | 174.15(18) | Mo6              | O33  | Mo7              | 91.67(12)  |

|                  |      |                  |            |                  |     |                   |            |
|------------------|------|------------------|------------|------------------|-----|-------------------|------------|
| O22              | Mo13 | O23              | 100.48(18) | Mo6              | O33 | Mo8               | 164.59(17) |
| O22              | Mo13 | O10              | 102.08(18) | Mo6 <sup>1</sup> | O33 | Mo8               | 91.60(10)  |
| O22              | Mo13 | O19              | 98.62(18)  | Mo5              | O33 | Mo6 <sup>1</sup>  | 97.38(12)  |
| O22              | Mo13 | O17              | 105.1(2)   | Mo5              | O33 | Mo7               | 163.55(17) |
| O17              | Mo13 | Mo11             | 131.76(13) | Mo5              | O33 | Mo8               | 86.07(11)  |
| O17              | Mo13 | O14              | 80.74(16)  | Mo7              | O33 | Mo6 <sup>1</sup>  | 97.22(13)  |
| O17              | Mo13 | O23              | 96.66(18)  | Mo7              | O33 | Mo8               | 85.99(10)  |
| O17              | Mo13 | O10              | 95.99(17)  | Mo6              | O32 | Mo5               | 109.51(15) |
| O17              | Mo13 | O19              | 156.30(17) | Mo6              | O32 | Mo7 <sup>1</sup>  | 110.11(15) |
| O36              | Mo7  | Mo6              | 34.77(10)  | Mo5              | O32 | Mo7 <sup>1</sup>  | 103.94(13) |
| O36              | Mo7  | O33              | 73.30(12)  | Mo6              | O38 | Mo8 <sup>1</sup>  | 118.15(16) |
| O36              | Mo7  | O32 <sup>1</sup> | 71.15(13)  | Mo4              | O46 | Mo4 <sup>2</sup>  | 104.37(13) |
| O33              | Mo7  | Mo6              | 41.82(7)   | Mo4 <sup>2</sup> | O46 | Mo1               | 97.62(15)  |
| O33              | Mo7  | O32 <sup>1</sup> | 71.77(12)  | Mo4              | O46 | Mo1               | 89.59(18)  |
| O32 <sup>1</sup> | Mo7  | Mo6              | 78.58(7)   | Mo4              | O46 | Mo3               | 92.33(12)  |
| O34              | Mo7  | Mo6              | 118.84(11) | Mo4 <sup>2</sup> | O46 | Mo2               | 94.89(16)  |
| O34              | Mo7  | O36              | 145.79(15) | Mo4              | O46 | Mo2               | 160.52(19) |
| O34              | Mo7  | O33              | 77.02(13)  | Mo4              | O46 | Mo1A              | 96.8(5)    |
| O34              | Mo7  | O32 <sup>1</sup> | 83.76(14)  | Mo3              | O46 | Mo4 <sup>2</sup>  | 97.69(13)  |
| O39              | Mo7  | Mo6              | 135.76(13) | Mo3              | O46 | Mo1               | 163.59(18) |
| O39              | Mo7  | O36              | 101.01(17) | Mo3              | O46 | Mo2               | 87.92(14)  |
| O39              | Mo7  | O33              | 159.84(18) | Mo2              | O46 | Mo1               | 84.90(18)  |
| O39              | Mo7  | O32 <sup>1</sup> | 88.07(18)  | Mo1A             | O46 | Mo3               | 160.5(3)   |
| O39              | Mo7  | O34              | 101.00(17) | Mo4              | O45 | Mo1 <sup>2</sup>  | 112.6(2)   |
| O37              | Mo7  | Mo6              | 85.38(14)  | Mo4              | O45 | Mo3               | 109.51(15) |
| O37              | Mo7  | O36              | 96.99(17)  | Mo4              | O45 | Mo1A <sup>2</sup> | 106.6(4)   |
| O37              | Mo7  | O33              | 94.50(18)  | Mo3              | O45 | Mo1 <sup>2</sup>  | 101.5(2)   |
| O37              | Mo7  | O32 <sup>1</sup> | 163.75(16) | Mo3              | O45 | Mo1A <sup>2</sup> | 109.4(5)   |
| O37              | Mo7  | O34              | 101.97(19) | Mo5              | O28 | Mo8               | 116.61(17) |
| O37              | Mo7  | O39              | 105.5(2)   | Mo7              | O34 | Mo8               | 117.63(17) |
| O46              | Mo4  | Mo1              | 48.47(14)  | Mo13             | O14 | Mo16              | 91.39(12)  |
| O46 <sup>2</sup> | Mo4  | Mo1              | 86.18(11)  | Mo12             | O14 | Mo13              | 104.16(16) |
| O46              | Mo4  | O46 <sup>2</sup> | 75.63(13)  | Mo12             | O14 | Mo15              | 92.00(14)  |
| O45              | Mo4  | Mo1              | 126.65(15) | Mo12             | O14 | Mo14              | 92.17(14)  |
| O45              | Mo4  | O46              | 78.21(14)  | Mo12             | O14 | Mo16              | 164.43(18) |
| O45              | Mo4  | O46 <sup>2</sup> | 77.95(13)  | Mo15             | O14 | Mo13              | 98.23(13)  |
| O40              | Mo4  | Mo1              | 130.59(17) | Mo15             | O14 | Mo14              | 163.15(19) |
| O40              | Mo4  | O46              | 157.07(17) | Mo15             | O14 | Mo16              | 86.17(13)  |
| O40              | Mo4  | O46 <sup>2</sup> | 81.44(16)  | Mo14             | O14 | Mo13              | 96.56(13)  |
| O40              | Mo4  | O45              | 97.11(17)  | Mo14             | O14 | Mo16              | 85.45(13)  |
| O40              | Mo4  | O41              | 96.38(18)  | Mo4              | O40 | Mo2 <sup>2</sup>  | 113.9(2)   |
| O43              | Mo4  | Mo1              | 89.59(15)  | Mo4              | O40 | Mo2A <sup>2</sup> | 123.7(4)   |
| O43              | Mo4  | O46 <sup>2</sup> | 174.12(17) | Mo13             | O23 | Mo10              | 110.21(19) |
| O43              | Mo4  | O46              | 98.50(18)  | Mo13             | O23 | Mo14              | 110.75(16) |

|                  |      |                  |            |      |     |                  |            |
|------------------|------|------------------|------------|------|-----|------------------|------------|
| O43              | Mo4  | O45              | 101.43(18) | Mo10 | O23 | Mo14             | 103.09(15) |
| O43              | Mo4  | O40              | 104.4(2)   | Mo4  | O41 | Mo1              | 111.6(2)   |
| O43              | Mo4  | O41              | 100.61(18) | Mo4  | O41 | Mo3 <sup>2</sup> | 110.11(16) |
| O41              | Mo4  | Mo1              | 34.21(15)  | Mo4  | O41 | Mo1A             | 105.6(4)   |
| O41              | Mo4  | O46              | 79.09(15)  | Mo1  | O41 | Mo3 <sup>2</sup> | 103.5(2)   |
| O41              | Mo4  | O46 <sup>2</sup> | 78.09(14)  | C43  | N5  | Cu1              | 119.5(4)   |
| O41              | Mo4  | O45              | 150.32(16) | C44  | N5  | Cu1              | 122.1(3)   |
| O38 <sup>1</sup> | Mo8  | O33              | 69.86(11)  | C44  | N5  | C43              | 118.0(4)   |
| O28              | Mo8  | O33              | 74.12(12)  | Mo13 | O10 | Mo11             | 109.09(18) |
| O28              | Mo8  | O38 <sup>1</sup> | 77.53(15)  | Mo13 | O10 | Mo15             | 110.41(16) |
| O34              | Mo8  | O33              | 74.15(12)  | Mo11 | O10 | Mo15             | 104.01(15) |
| O34              | Mo8  | O38 <sup>1</sup> | 77.80(15)  | Mo12 | O18 | Mo10             | 111.18(17) |
| O34              | Mo8  | O28              | 144.90(15) | Mo12 | O18 | Mo14             | 110.16(19) |
| O29              | Mo8  | O33              | 161.61(17) | Mo14 | O18 | Mo10             | 103.19(15) |
| O29              | Mo8  | O38 <sup>1</sup> | 91.76(17)  | Mo13 | O19 | Mo12             | 104.40(16) |
| O29              | Mo8  | O28              | 102.10(17) | Mo13 | O19 | Mo10             | 92.44(13)  |
| O29              | Mo8  | O34              | 103.23(17) | Mo13 | O19 | Mo11             | 90.85(13)  |
| O31              | Mo8  | O33              | 93.92(15)  | Mo13 | O19 | Mo9              | 162.84(18) |
| O31              | Mo8  | O38 <sup>1</sup> | 163.68(15) | Mo12 | O19 | Mo9              | 92.74(12)  |
| O31              | Mo8  | O28              | 96.71(19)  | Mo10 | O19 | Mo12             | 96.74(13)  |
| O31              | Mo8  | O34              | 100.1(2)   | Mo10 | O19 | Mo11             | 163.70(18) |
| O31              | Mo8  | O29              | 104.4(2)   | Mo10 | O19 | Mo9              | 86.15(12)  |
| O14              | Mo12 | Mo15             | 46.48(9)   | Mo11 | O19 | Mo12             | 97.89(13)  |
| O14              | Mo12 | O19              | 75.88(14)  | Mo11 | O19 | Mo9              | 86.02(12)  |
| O18              | Mo12 | Mo15             | 125.30(12) | C5   | N1  | Cu1 <sup>4</sup> | 120.8(3)   |
| O18              | Mo12 | O14              | 78.82(15)  | C1   | N1  | Cu1 <sup>4</sup> | 120.5(3)   |
| O18              | Mo12 | O19              | 77.65(14)  | C1   | N1  | C5               | 118.7(4)   |
| O19              | Mo12 | Mo15             | 86.72(9)   | C28  | N4  | Cu1              | 122.9(3)   |
| O4               | Mo12 | Mo15             | 35.55(13)  | C24  | N4  | Cu1              | 119.9(3)   |
| O4               | Mo12 | O14              | 78.32(15)  | C24  | N4  | C28              | 116.8(4)   |
| O4               | Mo12 | O18              | 150.14(15) | Mo2  | O47 | Mo1              | 115.2(3)   |
| O4               | Mo12 | O19              | 78.35(14)  | Mo1A | O47 | Mo2A             | 120.6(5)   |
| O9               | Mo12 | Mo15             | 132.35(13) | Mo12 | O4  | Mo11             | 110.63(17) |
| O9               | Mo12 | O14              | 155.64(16) | Mo12 | O4  | Mo15             | 109.77(19) |
| O9               | Mo12 | O18              | 96.13(18)  | Mo15 | O4  | Mo11             | 103.57(15) |
| O9               | Mo12 | O19              | 79.76(16)  | Mo12 | O9  | Mo9              | 117.22(18) |
| O9               | Mo12 | O4               | 96.81(18)  | C30  | N7  | Cu1              | 120.8(3)   |
| O11              | Mo12 | Mo15             | 90.83(15)  | C29  | N7  | Cu1              | 121.5(3)   |
| O11              | Mo12 | O14              | 100.00(19) | C29  | N7  | C30              | 117.8(4)   |
| O11              | Mo12 | O18              | 101.12(18) | Mo10 | O21 | Mo9              | 115.58(19) |
| O11              | Mo12 | O19              | 175.84(18) | Mo13 | O17 | Mo16             | 117.93(19) |
| O11              | Mo12 | O4               | 101.54(18) | Mo11 | O5  | Mo9              | 115.9(2)   |
| O11              | Mo12 | O9               | 104.4(2)   | Mo14 | O16 | Mo16             | 118.0(2)   |
| Mo4              | Mo1  | Mo2              | 87.39(14)  | C10  | N2  | C11              | 119.9(5)   |

|                  |      |                  |            |      |     |      |          |
|------------------|------|------------------|------------|------|-----|------|----------|
| O46              | Mo1  | Mo4              | 41.94(11)  | C10  | N2  | C6   | 119.4(4) |
| O46              | Mo1  | Mo2              | 46.94(14)  | C6   | N2  | C11  | 120.6(5) |
| O45 <sup>2</sup> | Mo1  | Mo4              | 78.39(14)  | C37  | N8  | C39  | 116.8(4) |
| O45 <sup>2</sup> | Mo1  | Mo2              | 85.76(19)  | C38  | N8  | C37  | 120.1(4) |
| O45 <sup>2</sup> | Mo1  | O46              | 69.81(18)  | C38  | N8  | C39  | 123.1(4) |
| O41              | Mo1  | Mo4              | 34.19(14)  | Mo3  | O51 | Mo2  | 114.2(2) |
| O41              | Mo1  | Mo2              | 119.8(2)   | Mo2A | O51 | Mo3  | 128.0(5) |
| O41              | Mo1  | O46              | 72.8(2)    | Mo15 | O8  | Mo16 | 118.0(2) |
| O41              | Mo1  | O45 <sup>2</sup> | 72.49(19)  | C3   | C2  | C1   | 120.9(5) |
| O41              | Mo1  | O47              | 143.3(3)   | C51  | C49 | C48  | 119.5(5) |
| O47              | Mo1  | Mo4              | 116.1(3)   | C51  | N6  | C53  | 121.0(5) |
| O47              | Mo1  | Mo2              | 30.94(15)  | C51  | N6  | C52  | 120.5(5) |
| O47              | Mo1  | O46              | 74.2(2)    | C52  | N6  | C53  | 118.4(5) |
| O47              | Mo1  | O45 <sup>2</sup> | 81.4(2)    | N5   | C43 | C46  | 122.2(5) |
| O42              | Mo1  | Mo4              | 140.5(3)   | C25  | C26 | C21  | 122.1(5) |
| O42              | Mo1  | Mo2              | 130.1(3)   | C25  | C26 | C27  | 117.7(5) |
| O42              | Mo1  | O46              | 160.1(3)   | C27  | C26 | C21  | 120.2(5) |
| O42              | Mo1  | O45 <sup>2</sup> | 90.8(2)    | C2   | C3  | C8   | 121.1(5) |
| O42              | Mo1  | O41              | 106.3(3)   | C4   | C3  | C2   | 117.7(4) |
| O42              | Mo1  | O47              | 99.3(3)    | C4   | C3  | C8   | 121.2(5) |
| O42              | Mo1  | O44              | 107.1(3)   | C43  | C46 | C47  | 119.8(5) |
| O44              | Mo1  | Mo4              | 85.5(2)    | N6   | C51 | C49  | 121.5(5) |
| O44              | Mo1  | Mo2              | 85.2(3)    | N1   | C5  | C4   | 123.0(5) |
| O44              | Mo1  | O46              | 92.6(3)    | N5   | C44 | C45  | 122.9(5) |
| O44              | Mo1  | O45 <sup>2</sup> | 161.8(3)   | N7   | C30 | C32  | 122.5(5) |
| O44              | Mo1  | O41              | 98.6(3)    | C46  | C47 | C45  | 118.2(5) |
| O44              | Mo1  | O47              | 98.5(3)    | C46  | C47 | C48  | 121.1(4) |
| O23              | Mo10 | O18              | 72.02(14)  | C45  | C47 | C48  | 120.7(5) |
| O23              | Mo10 | O19              | 72.77(14)  | C32  | C33 | C34  | 120.5(4) |
| O18              | Mo10 | O19              | 71.56(13)  | C32  | C33 | C31  | 117.9(5) |
| O21              | Mo10 | O23              | 146.28(16) | C31  | C33 | C34  | 121.5(5) |
| O21              | Mo10 | O18              | 84.10(16)  | C37  | C35 | C34  | 119.4(5) |
| O21              | Mo10 | O19              | 77.34(15)  | C44  | C45 | C47  | 118.8(5) |
| O26              | Mo10 | O23              | 96.90(18)  | N8   | C37 | C35  | 121.5(5) |
| O26              | Mo10 | O18              | 164.29(16) | N8   | C38 | C36  | 121.0(5) |
| O26              | Mo10 | O19              | 94.80(17)  | N2   | C10 | C9   | 122.2(6) |
| O26              | Mo10 | O21              | 100.8(2)   | C35  | C34 | C33  | 120.6(5) |
| O25              | Mo10 | O23              | 103.0(2)   | C36  | C34 | C33  | 121.8(5) |
| O25              | Mo10 | O18              | 89.36(18)  | C36  | C34 | C35  | 117.6(5) |
| O25              | Mo10 | O19              | 160.89(18) | C7   | C8  | C3   | 121.3(5) |
| O25              | Mo10 | O21              | 100.1(2)   | C9   | C8  | C3   | 122.4(5) |
| O25              | Mo10 | O26              | 104.3(2)   | C9   | C8  | C7   | 116.4(5) |
| O10              | Mo11 | Mo13             | 35.14(10)  | C6   | C7  | C8   | 120.8(5) |
| O10              | Mo11 | O19              | 73.33(14)  | C38  | C36 | C34  | 120.2(5) |

|     |      |                  |            |                  |     |                  |          |
|-----|------|------------------|------------|------------------|-----|------------------|----------|
| O10 | Mo11 | O4               | 71.32(14)  | C33              | C32 | C30              | 119.9(5) |
| O19 | Mo11 | Mo13             | 41.72(9)   | N1               | C1  | C2               | 120.6(5) |
| O19 | Mo11 | O4               | 70.61(13)  | C49              | C48 | C47              | 121.7(5) |
| O4  | Mo11 | Mo13             | 78.45(9)   | C50              | C48 | C49              | 118.0(5) |
| O5  | Mo11 | Mo13             | 118.24(12) | C50              | C48 | C47              | 120.3(5) |
| O5  | Mo11 | O10              | 145.24(16) | C29              | C31 | C33              | 119.5(5) |
| O5  | Mo11 | O19              | 76.53(15)  | C16              | C15 | C18              | 121.9(6) |
| O5  | Mo11 | O4               | 82.70(16)  | C14              | C15 | C16              | 118.1(6) |
| O6  | Mo11 | Mo13             | 86.24(16)  | C14              | C15 | C18              | 119.9(6) |
| O6  | Mo11 | O10              | 98.54(19)  | N4               | C28 | C27              | 122.6(5) |
| O6  | Mo11 | O19              | 94.96(18)  | N2               | C11 | C12              | 113.9(5) |
| O6  | Mo11 | O4               | 164.05(18) | C13              | C12 | C11              | 120.7(6) |
| O6  | Mo11 | O5               | 100.9(2)   | C13              | C12 | C17              | 118.7(6) |
| O6  | Mo11 | O1               | 104.5(2)   | C17              | C12 | C11              | 120.6(6) |
| O1  | Mo11 | Mo13             | 136.94(18) | C19              | N3  | C18              | 120.3(6) |
| O1  | Mo11 | O10              | 101.8(2)   | C23              | N3  | C19              | 121.5(6) |
| O1  | Mo11 | O19              | 160.45(19) | C23              | N3  | C18              | 117.9(6) |
| O1  | Mo11 | O4               | 89.86(18)  | C20              | C21 | C26              | 120.8(5) |
| O1  | Mo11 | O5               | 100.8(2)   | C22              | C21 | C26              | 122.6(6) |
| O14 | Mo15 | Mo12             | 41.52(10)  | C22              | C21 | C20              | 116.6(6) |
| O14 | Mo15 | O10              | 71.20(13)  | C42              | C40 | C39              | 119.3(5) |
| O10 | Mo15 | Mo12             | 78.78(9)   | C41              | C40 | C42              | 118.5(5) |
| O4  | Mo15 | Mo12             | 34.68(11)  | C41              | C40 | C39              | 122.0(5) |
| O4  | Mo15 | O14              | 72.80(15)  | N4               | C24 | C25              | 123.3(5) |
| O4  | Mo15 | O10              | 71.59(14)  | N7               | C29 | C31              | 122.4(5) |
| O8  | Mo15 | Mo12             | 118.57(13) | C26              | C25 | C24              | 120.4(5) |
| O8  | Mo15 | O14              | 77.06(16)  | C3               | C4  | C5               | 119.0(5) |
| O8  | Mo15 | O10              | 82.68(17)  | C54              | C55 | C56              | 120.1(5) |
| O8  | Mo15 | O4               | 145.23(17) | C17              | C16 | C15              | 121.2(6) |
| O2  | Mo15 | Mo12             | 135.03(17) | C26              | C27 | C28              | 119.2(5) |
| O2  | Mo15 | O14              | 159.11(19) | C41 <sup>5</sup> | C42 | C40              | 120.2(6) |
| O2  | Mo15 | O10              | 87.92(18)  | N2               | C6  | C7               | 120.8(5) |
| O2  | Mo15 | O4               | 100.4(2)   | N6               | C53 | C54              | 112.1(5) |
| O2  | Mo15 | O8               | 101.7(2)   | C55              | C54 | C53              | 121.4(6) |
| O2  | Mo15 | O3               | 104.8(2)   | C55              | C54 | C56 <sup>6</sup> | 119.2(6) |
| O3  | Mo15 | Mo12             | 86.88(17)  | C56 <sup>6</sup> | C54 | C53              | 119.4(6) |
| O3  | Mo15 | O14              | 95.85(18)  | C52              | C50 | C48              | 120.1(6) |
| O3  | Mo15 | O10              | 165.29(18) | C54 <sup>6</sup> | C56 | C55              | 120.7(6) |
| O3  | Mo15 | O4               | 98.3(2)    | C40              | C39 | N8               | 115.5(4) |
| O3  | Mo15 | O8               | 101.6(2)   | C10              | C9  | C8               | 120.5(6) |
| O46 | Mo3  | O41 <sup>2</sup> | 71.34(12)  | N3               | C19 | C20              | 119.7(7) |
| O45 | Mo3  | O46              | 73.07(13)  | C42 <sup>5</sup> | C41 | C40              | 121.2(6) |
| O45 | Mo3  | O41 <sup>2</sup> | 71.62(14)  | C14              | C13 | C12              | 121.1(6) |
| O51 | Mo3  | O46              | 76.84(16)  | C13              | C14 | C15              | 121.0(7) |



|     |      |                  |            |     |      |                  |          |
|-----|------|------------------|------------|-----|------|------------------|----------|
| O51 | Mo3  | O45              | 146.08(16) | N6  | C52  | C50              | 120.3(6) |
| O51 | Mo3  | O41 <sup>2</sup> | 84.28(17)  | C21 | C20  | C19              | 121.3(6) |
| O48 | Mo3  | O46              | 95.5(2)    | C16 | C17  | C12              | 119.9(6) |
| O48 | Mo3  | O45              | 95.8(2)    | N3  | C18  | C15              | 111.0(5) |
| O48 | Mo3  | O41 <sup>2</sup> | 163.8(2)   | C21 | C22  | C23              | 120.4(7) |
| O48 | Mo3  | O51              | 102.4(2)   | N3  | C23  | C22              | 120.3(7) |
| O48 | Mo3  | O50              | 105.3(3)   | O46 | Mo1A | O45 <sup>2</sup> | 73.4(3)  |
| O50 | Mo3  | O46              | 158.9(2)   | O41 | Mo1A | O46              | 72.6(3)  |
| O50 | Mo3  | O45              | 101.07(19) | O41 | Mo1A | O45 <sup>2</sup> | 69.4(3)  |
| O50 | Mo3  | O41 <sup>2</sup> | 87.5(2)    | O47 | Mo1A | O46              | 85.0(8)  |
| O50 | Mo3  | O51              | 101.4(2)   | O47 | Mo1A | O45 <sup>2</sup> | 89.3(6)  |
| O23 | Mo14 | O14              | 71.80(13)  | O47 | Mo1A | O41              | 152.5(7) |
| O18 | Mo14 | O14              | 72.45(14)  | O47 | Mo1A | O42              | 105.0(6) |
| O18 | Mo14 | O23              | 71.53(14)  | O47 | Mo1A | O44              | 109.8(7) |
| O16 | Mo14 | O14              | 77.00(16)  | O42 | Mo1A | O46              | 158.3(6) |
| O16 | Mo14 | O23              | 83.76(17)  | O42 | Mo1A | O45 <sup>2</sup> | 87.3(4)  |
| O16 | Mo14 | O18              | 145.32(16) | O42 | Mo1A | O41              | 91.6(8)  |
| O15 | Mo14 | O14              | 94.87(18)  | O44 | Mo1A | O46              | 97.2(4)  |
| O15 | Mo14 | O23              | 163.85(19) | O44 | Mo1A | O45 <sup>2</sup> | 158.1(9) |
| O15 | Mo14 | O18              | 96.1(2)    | O44 | Mo1A | O41              | 89.1(7)  |
| O15 | Mo14 | O16              | 102.5(2)   | O44 | Mo1A | O42              | 97.3(8)  |
| O15 | Mo14 | O24              | 104.3(2)   | O47 | Mo2A | O40 <sup>2</sup> | 76.4(2)  |
| O24 | Mo14 | O14              | 160.41(19) | O51 | Mo2A | O40 <sup>2</sup> | 83.9(3)  |
| O24 | Mo14 | O23              | 88.62(18)  | O51 | Mo2A | O47              | 136.5(5) |
| O24 | Mo14 | O18              | 101.1(2)   | O51 | Mo2A | O49              | 94.4(4)  |
| O24 | Mo14 | O16              | 102.2(2)   | O49 | Mo2A | O40 <sup>2</sup> | 146.5(6) |
| O9  | Mo9  | O19              | 70.27(14)  | O49 | Mo2A | O47              | 82.4(5)  |
| O21 | Mo9  | O19              | 75.29(15)  | O52 | Mo2A | O40 <sup>2</sup> | 107.8(6) |
| O21 | Mo9  | O9               | 76.77(16)  | O52 | Mo2A | O47              | 101.0(4) |
| O5  | Mo9  | O19              | 75.62(15)  | O52 | Mo2A | O51              | 121.9(8) |
| O5  | Mo9  | O9               | 78.31(16)  | O52 | Mo2A | O49              | 101.4(4) |
| O5  | Mo9  | O21              | 146.63(18) |     |      |                  |          |

---

Symmetry codes for **4**: <sup>1</sup>2-X,-Y,2-Z; <sup>2</sup>-1-X,-Y,1-Z; <sup>3</sup>-1+X,+Y,-1+Z; <sup>4</sup>1+X,+Y,1+Z; <sup>5</sup>-1-X,1-Y,1-Z; <sup>6</sup>1-X,-Y,-Z.

---

## Reference

- [1] B. Tan, C. Chen, L.X. Cai, Y.J. Zhang, X.Y. Huang, et al., Introduction of Lewis Acidic and Redox-Active Sites into a Porous Framework for Ammonia Capture with Visual Color Response, *Inorg. Chem.* **2015**, 54, 3456.
- [2] Z.P. Dong, L. Zhang, Z.L. Liu, Y.Q. Wang. Two new coordination polymers constructed by two viologen-derived ligands: Structure and photochromism, *Journal of Molecular Structure*.

2020, 1221, 128782.

- [3] J.K. Sun, X.H. Jin, L.X. Caia, J. Zhang, Supramolecular isomer-dependent photochromism and emission color tuning of bipyridinium salts, *J. Mater. Chem.* **2011**, 21, 17667.
- [4] B. Delley, From molecules to solids with the DMol<sup>3</sup> approach, *J. Chem. Phys.* **2000**, 113, 7756.
- [5] B.X. Dong, Q. Xu, Investigation of Flexible Organic Ligands in the Molybdate System: Delicate Influence of a Peripheral Cluster Environment on the Isopolymolybdate Frameworks, *Inorg. Chem.* **2009**, 48, 5861.
- [6] S.F. Ma, J. Ying, Y.P. Zhang, A.X. Tian. Four POM-based complexes modified by multi-nuclear clusters: structure, photocatalytic, supercapacitor and chromogenic properties, *CrystEngComm.* **2022**, 24, 2891.
- [7] Y.Q. Sun, F. Wan, X.X. Li, J. Lin, T. Wu, et al., Lanthanide Complex for Secondary Metal Encapsulations and Anion Exchanges with Versatile Colorimetric and Thermo-chromic Responses, *Chem. Commun.* **2016**, 52, 10125.
- [8] Y.Q. Sun, J. Zhang, Z.F. Ju, G.Y. Yang, Two-Dimensional Noninterpenetrating Transition Metal Coordination Polymers with Large Honeycomb-like Hexagonal Cavities Constructed from a Carboxybenzyl Viologen Ligand, *Crystal Growth & Design.* **2005**, 5, 1939.
- [9] B. Tan, C. Chen, L.X. Cai, Y.J. Zhang, X.Y. Huang, et al., Introduction of Lewis Acidic and Redox-Active Sites into a Porous Framework for Ammonia Capture with Visual Color Response, *Inorg. Chem.* **2015**, 54, 3456.
